# Supplementary material for: Targeted, programmable, and precise tandem duplication in the mammalian genome
Source: HighWire-hosted journal article supplement (doi:10.1101/gr.277261.122), 2023-05-01
Supplement: Supplemental_information.pdf [file Supplemental_information.pdf]

## **Supplemental information**

### **Targeted, programmable and precise tandem duplication in**

### **mammalian genome**

Yaoge Jiao<sup>1#</sup>, Min Li<sup>1#</sup>, Xingyu He<sup>1#</sup>, Yanhong Wang<sup>1#</sup>, Junwei Song<sup>1</sup>, Yun Hu<sup>1</sup>, Li  
Li<sup>1</sup>, Lifang Zhou<sup>1</sup>, Lurong Jiang<sup>1</sup>, Junyan Qu<sup>2</sup>, Lifang Xie<sup>3</sup>, Qiang Chen<sup>1</sup>, Shaohua  
Yao<sup>1\*</sup>

*FANCF* TD 50-bp

✓ Wild-type sequence:

PAM1    nick

CCAAGGTGAAAGCGGAAGTAGGGCCTTCGCGCACCTCATGGAATCCCTTCTGCAGCACCTGGATCGCTTTTC

Reference sequence:

CCAAGGTGAAAGCGGAAGTAGGGCCTTCGCGACCTCATGGAATCCCTTCTGCAGCTGAAAGCGGAAGTAGGGCCTTCGCGACCTCATGGAATCCCTTCTGCAGCACCTGGATCGCTTTTC

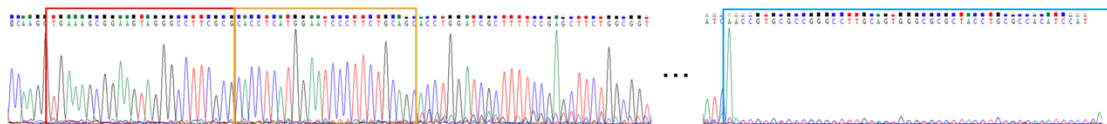

**Supplemental Fig. S1** Representative Sanger sequencing results of TD-PE mediated 50-bp tandem duplication at *FANCF* site. PCR amplicons containing targeted tandem duplication was purified and directly subjected to Sanger sequencing. Wild-type sequence and TD reference sequence were shown on top of the sequencing chromatogram. PAM1 and PAM2 of the two pegRNAs were shown in red and yellow respectively. Red arrows indicated the positions of the nicks. The sequences in-between two nicks are the duplicated sequences, with the upstream end shown in red and the downstream end shown in yellow. The peaks in the sequencing chromatogram corresponding to each end were boxed in red and yellow respectively. The blue box marked the fragment that is located at the end of the double peaks. The length of the fragment is the same as that of the duplicated region, and the sequence corresponds to the 3' end of the amplicons that contain TDs.

[illegible]



**Supplemental Fig. S2** HTS sequences showing the editing result of TD-PE at the *FANCF* site. The fragments containing tandem duplications were amplified by HTS primers and subjected for HTS analysis. Detailed analysis of the undesired TDs revealed that the majority of deletions and insertions occurred at the boundaries of the duplications. The blue curved arrows pointed to the next copy of the tandem duplication. Deletion, insertion and base substitution were indicated by black dash, red box and green letters respectively. The insertion sequence of the red box was consistent with its 5' upstream sequence. Note that to provide an overview of the TDs, we copied the sequences of 2×TD from Fig. 2E to this section.

|                         | <div> <div>PAM1</div> <div>nick</div> <div>PAM2</div> </div>                                                                                                                                                          |                                                                                    |
|-------------------------|-----------------------------------------------------------------------------------------------------------------------------------------------------------------------------------------------------------------------|------------------------------------------------------------------------------------|
| Wild-type sequence :    | <div> <div> <div>AACCGGAGGACAAAGTACAAACGGGCAGAAAGCTGGAGGAGGAAGGGCCTGAGTCCGAGCAGAAGAA</div> <div>GAA</div> <div>GGGCTCCCATCA</div> </div> </div>                                                                       | <div> <div>----</div> Cleavage <div>-</div> Deletion <div>□</div> Insertion </div> |
| 2 × TD ( Accurate ) :   | <div> <div> <div>AACCGGAGGACAAAGTACAAACGGGCAGAAAGCTGGAGGAGGAAGGGCCTGAGTCCGAGCAGAAGAA</div> <div>GACAAAGTACAAACGGCAGAAAGCTGGAGGAGGAAGGGCCTGAGTCCGAGCAGAAGAA</div> <div>GAA</div> <div>GGGCTCCCATCA</div> </div> </div> | reads / total reads<br>64435 / 389912 (16.53%)                                     |
| 2 × TD with deletion :  | <div> <div> <div>AACCGGAGGACAAAGTACAAACGGGCAGAAAGCTGGAGGAGGAAGGGCCTGAGTCCGAGCAGAAGAA</div> <div>GACAAAGTACAAACGGCAGAAAGCTGGAGGAGGAAGGGCCTGAGTCCGAGCAGAAGAA</div> <div>GAA</div> <div>GGGCTCCCATCA</div> </div> </div> | 256 / 389912 (0.066%)                                                              |
| 2 × TD with insertion : | <div> <div> <div>AACCGGAGGACAAAGTACAAACGGGCAGAAAGCTGGAGGAGGAAGGGCCTGAGTCCGAGCAGAAGAA</div> <div>GACAAAGTACAAACGGCAGAAAGCTGGAGGAGGAAGGGCCTGAGTCCGAGCAGAAGAA</div> <div>GAA</div> <div>GGGCTCCCATCA</div> </div> </div> | 95 / 389912 (0.024%)                                                               |
| 3 × TD ( Accurate ) :   | <div> <div> <div>AACCGGAGGACAAAGTACAAACGGGCAGAAAGCTGGAGGAGGAAGGGCCTGAGTCCGAGCAGAAGAA</div> <div>GACAAAGTACAAACGGCAGAAAGCTGGAGGAGGAAGGGCCTGAGTCCGAGCAGAAGAA</div> <div>GAA</div> <div>GGGCTCCCATCA</div> </div> </div> | 11889 / 389912 (3.05%)                                                             |
| 4 × TD ( Accurate ) :   | <div> <div> <div>AACCGGAGGACAAAGTACAAACGGGCAGAAAGCTGGAGGAGGAAGGGCCTGAGTCCGAGCAGAAGAA</div> <div>GACAAAGTACAAACGGCAGAAAGCTGGAGGAGGAAGGGCCTGAGTCCGAGCAGAAGAA</div> <div>GAA</div> <div>GGGCTCCCATCA</div> </div> </div> | 404 / 389912 (0.10%)                                                               |
| 5 × TD :                | <div> <div> <div>AACCGGAGGACAAAGTACAAACGGGCAGAAAGCTGGAGGAGGAAGGGCCTGAGTCCGAGCAGAAGAA</div> <div>GACAAAGTACAAACGGCAGAAAGCTGGAGGAGGAAGGGCCTGAGTCCGAGCAGAAGAA</div> <div>GAA</div> <div>GGGCTCCCATCA</div> </div> </div> | 113 / 389912 (0.029%)                                                              |
| Deletion without edit : | <div> <div> <div>AACCGGAGGACAAAGTACAAACGGGCAGAAAGCTGGAGGAGGAAGGGCCTGAGTCCGAGCAGAAGAA</div> <div>GAA</div> <div>GGGCTCCCATCA</div> </div> </div>                                                                       | 118 / 389912 (0.030%)                                                              |

**Supplemental Fig. S3** HTS sequences showing the editing result of TD-PE at the *EMX1* site. The fragments containing tandem duplication were amplified by HTS primers, purified and then subjected for HTS. The blue curved arrows pointed to the next copy of the tandem duplication. Deletion, insertion and base substitution were indicated by black dash, red box or green letters respectively. The insertion sequence of the red box was consistent with its 5' upstream sequence.

*FANCF* TD 50-bp 2×TD insertion

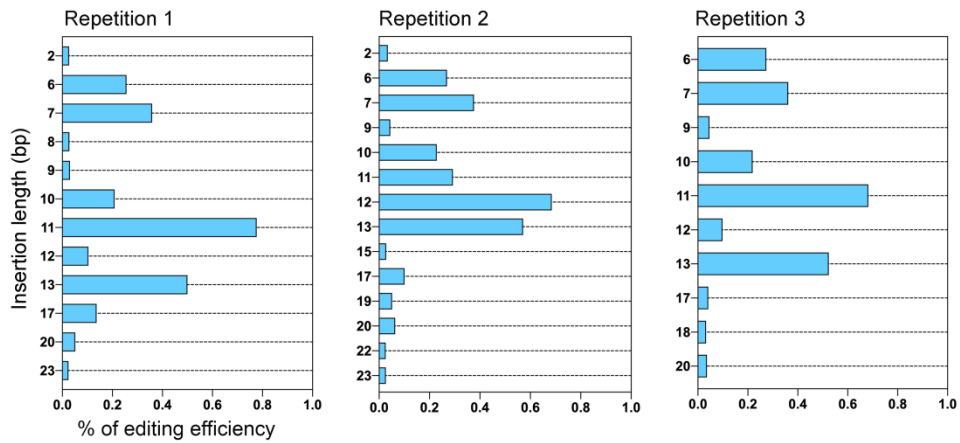

*FANCF* TD 50-bp 2×TD deletion

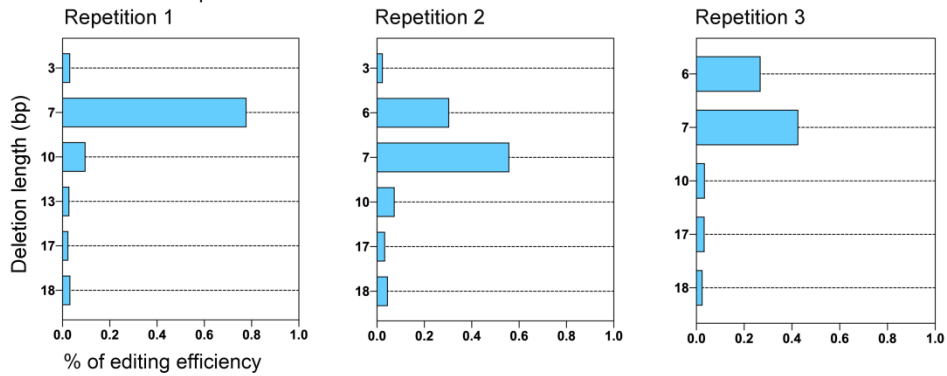

*FANCF* TD 50-bp 3×TD insertion

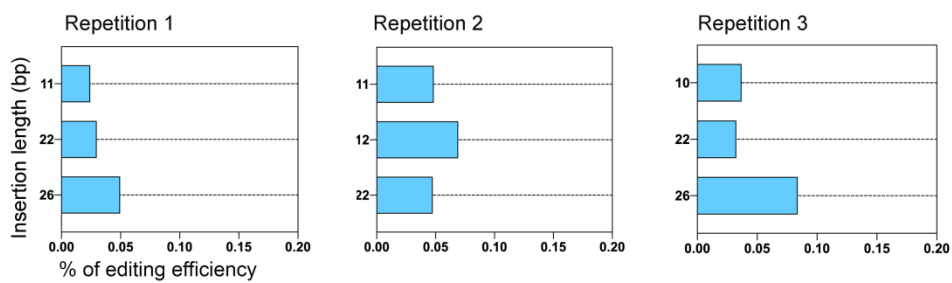

*FANCF* TD 50-bp 3×TD deletion

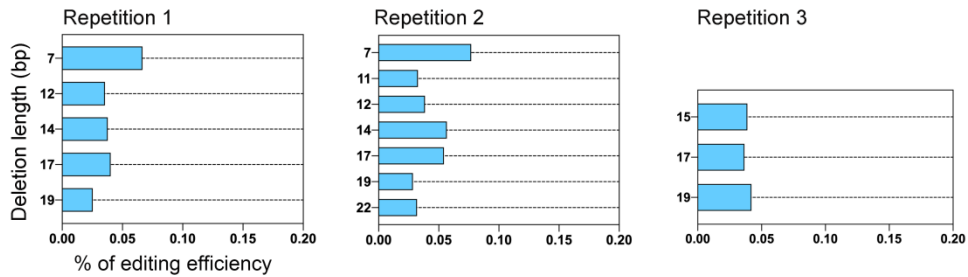

*FANCF* TD 50-bp 4×TD deletion

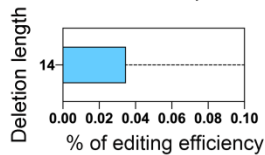

**Supplemental Fig. S4** Distribution of the insertion or deletion lengths at *FANCF* site. HTS analysis of the frequencies of undesired edits induced by TD-PE at *FANCF* site (TD 50-bp). The experiment was repeated three times, and the indel data from each repetition were presented separately. Note that the deletion in 4×TD was detectable in only one out of three repetitions.

*EMX1* TD 57-bp 2×TD insertion

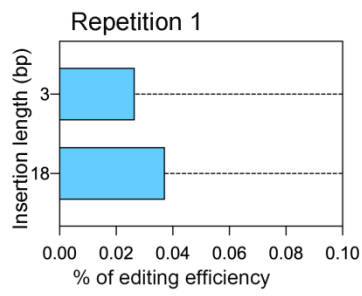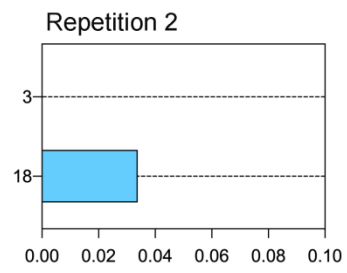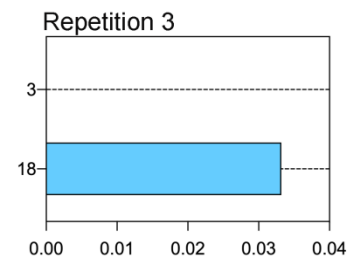

*EMX1* TD 57-bp 2×TD deletion

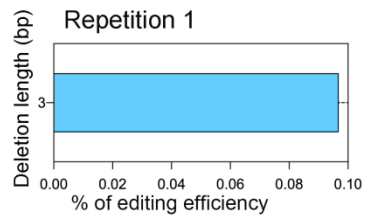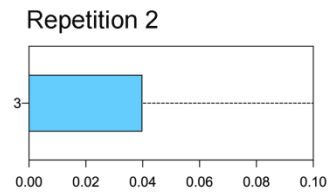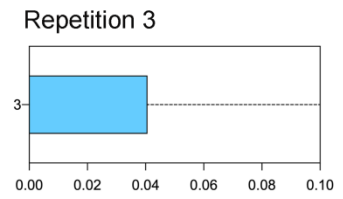

**Supplemental Fig. S5** Distribution of the insertion or deletion lengths at *EMXI* site. HTS analysis of the frequencies of undesired edits induced by TD-PE at *EMXI* site (TD 57-bp). The experiment was repeated three times, and the indel data from each repetition were presented separately.

AAVS1 TD 376-bp 2×TD

TD reference sequence: GTTTTCTGGACAACCCCAAAGTACCCCGTCTCCCTGGCT...AGTGGGGCCACTAGGGACAGAGTACCCCGTCTCCCTGGCT...AGTGGGGCCACTAGGGACAGGATTGGTGACAGAAAAGCCC

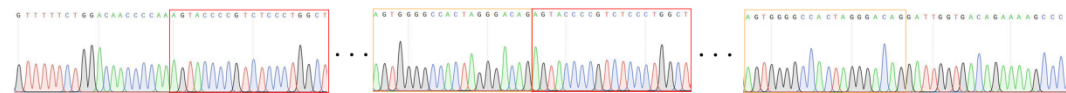

AAVS1 TD 532-bp 2×TD

TD reference sequence: CCTCCCTCACCCAACCCCATGCCGTCTTCACTCGCTGGGT...AGTGGGGCCACTAGGGACAGGCCGTCTTCACTCGCTGGGT...AGTGGGGCCACTAGGGACAGGATTGGTGACAGAAAAGCCC

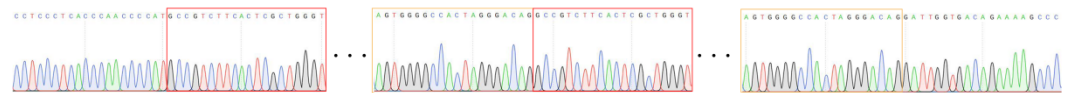

AAVS1 TD 846-bp 2×TD

TD reference sequence: TGGCTTCTGCGCCGCCTCTGGCCACTGTTTCCCCTGCC...AGTGGGGCCACTAGGGACAGGCCACTGTTTCCCCTGCC...AGTGGGGCCACTAGGGACAGGATTGGTGACAGAAAAGCCC

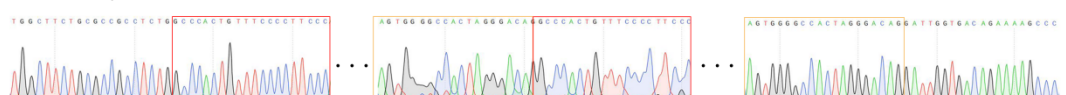



**Supplemental Fig. S6** Representative Sanger sequencing results of large fragment TDs at the *AAVS1* site (related to Fig. 3A). Representative Sanger sequencing results of TD containing amplicons derived from 3 targeted TDs at the *AAVS1* site. The amplicons containing targeted TDs were gel-purified and subjected directly to Sanger sequencing. TD reference sequence was shown on top of each sequencing chromatogram, with sequences corresponding to each end of the TD boxed in red and yellow respectively.

EMX1 TD 116-bp 2×TD

TD reference sequence: TGCTCTGGGGGCTCCTGAGTTTCTCATCTGTGCCCTCC--CCTGAGTCCGAGCAGAAGATTCTCATCTGTGCCCTCC--CCTGAGTCCGAGCAGAAGAAAGAGGGCTCCATCACATCA

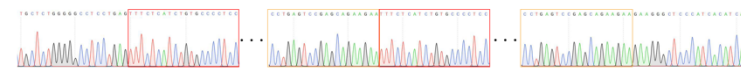

EMX1 TD 116-bp 3×TD

TD reference sequence: TGCTCTGGGGGCTCCTGAGTTTCTCATCTGTGCCCTCC--CCTGAGTCCGAGCAGAAGATTCTCATCTGTGCCCTCC--CCTGAGTCCGAGCAGAAGAAAGAGGGCTCCATCACATCA

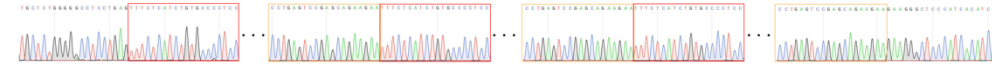

EMX1 TD 116-bp 4×TD

TD reference sequence: TGCTCTGGGGGCTCCTGAGTTTCTCATCTGTGCCCTCC--CCTGAGTCCGAGCAGAAGATTCTCATCTGTGCCCTCC--CCTGAGTCCGAGCAGAAGAAAGAGGGCTCCATCACATCA

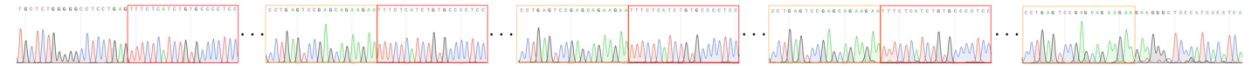

EMX1 TD 201-bp 2×TD

TD reference sequence: GCCCGGCTGGGGGCTTAACCTATGAGCTCAGTCTT--CCTGAGTCCGAGCAGAAGAAAGAGGGCTCCATCACATCA

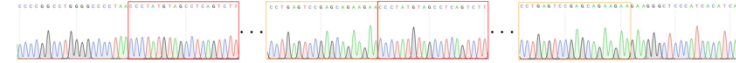

EMX1 TD 307-bp 2×TD

TD reference sequence: GAGGAACAGGAAACACCTTCTCTGTGCCCACTGT--CCTGAGTCCGAGCAGAAGATTCTCTGTGCCCACTGT--CCTGAGTCCGAGCAGAAGAAAGAGGGCTCCATCACATCA

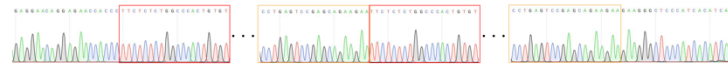

**Supplemental Fig. S7** Representative Sanger sequencing results of large fragment TDs at the *EMXI* site (related to Fig. 3A). Representative Sanger sequencing results of TD containing amplicons derived from 3 targeted TDs at *EMXI* site. The amplicons containing targeted TDs were gel-purified and subjected to Sanger sequencing. TD reference sequence was shown on top of each sequencing chromatogram, with sequences corresponding to each end of the TD boxed in red and yellow respectively. *EMXI* TD 116-bp 3×TD and 4×TD were the sequencing results of the bands marked red stars (\*) at the *EMXI* site in Fig. 3A.

*FANCF* TD 115-bp 2×TD

TD reference sequence: GGGCTTTTAAAGTTGCCCAGAGTCAAGGAACACGGATAAAG...TACGCAGAGAGTCGCCGTCTGTCAAGGAACACGGATAAAG...TACGCAGAGAGTCGCCGTCTCCAAGGTGAAAGCGGAAGTA

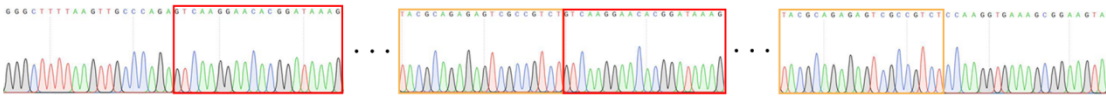

*FANCF* TD 171-bp 2×TD

TD reference sequence: GGGCTTTTAAAGTTGCCCAGAGTCAAGGAACACGGATAAAG...CATGGAATCCCTTCTGCAGCGTCAAGGAACACGGATAAAG...CATGGAATCCCTTCTGCAGCACCTGGATCGCTTTTCCGAG

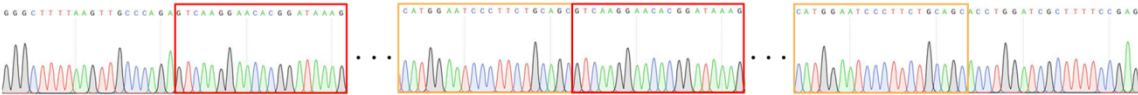

*FANCF* TD 231-bp 2×TD

TD reference sequence: CTACATCTGCTCTCCCTCCACTAAGAAGAACCTCTTTGTG...CATGGAATCCCTTCTGCAGCGTCAAGAAGAACCTCTTTGTG...CATGGAATCCCTTCTGCAGCACCTGGATCGCTTTTCCGAG

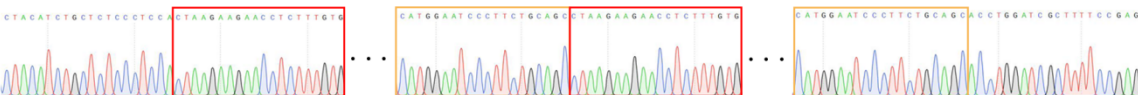

**Supplemental Fig. S8** Representative Sanger sequencing results of large fragment TDs at the *FANCF* site (related to Fig. 3A). Representative Sanger sequencing results of TD containing amplicons derived from 3 targeted TDs at *FANCF* site. The amplicons containing targeted TDs were gel-purified and subjected to Sanger sequencing. TD reference sequence was shown on top of each sequencing chromatogram, with sequences corresponding to each end of the TD boxed in red and yellow.

HEK3 TD 136-bp 2×TD

TD reference sequence: ATGGATGAGAGAAGCCTGGA**GACAGGGATCCAGGGAACG**~TGGGGCCAGACTGAGCAC**GACAGGGATCCAGGGAACG**~TGGGGCCAGACTGAGCAC**TGATGGCAGAGAAAGGAAG**

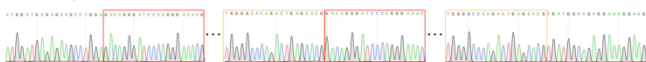

HEK3 TD 136-bp 3×TD

TD reference sequence: ATGGATGAGAGAAGCCTGGA**GACAGGGATCCAGGGAACG**~TGGGGCCAGACTGAGCAC**GACAGGGATCCAGGGAACG**~TGGGGCCAGACTGAGCAC**GACAGGGATCCAGGGAACG**~TGGGGCCAGACTGAGCAC**TGATGGCAGAGAAAGGAAG**

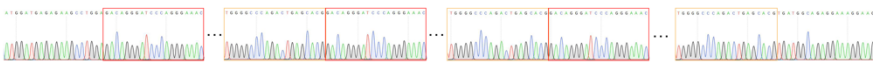

HEK3 TD 136-bp 4×TD

TD reference sequence: ATGGATGAGAGAAGCCTGGA**GACAGGGATCCAGGGAACG**~TGGGGCCAGACTGAGCAC**GACAGGGATCCAGGGAACG**~TGGGGCCAGACTGAGCAC**GACAGGGATCCAGGGAACG**~TGGGGCCAGACTGAGCAC**GACAGGGATCCAGGGAACG**~TGGGGCCAGACTGAGCAC**TGATGGCAGAGAAAGGAAG**

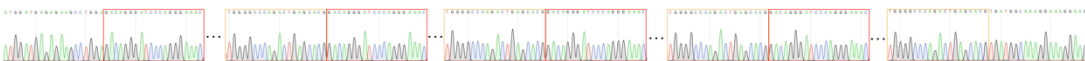

HEK3 TD 222-bp 2×TD

TD reference sequence: AGGGCTGGGATGTCCTGCA**GGGAGCTTGGCATGAGAAAC**~TGGGGCCAGACTGAGCAC**GGGAGCTTGGCATGAGAAAC**~TGGGGCCAGACTGAGCAC**TGATGGCAGAGAAAGGAAG**

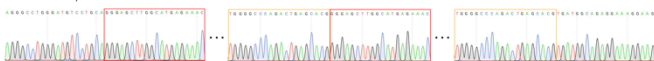

HEK3 TD 222-bp 3×TD

TD reference sequence: AGGGCTGGGATGTCCTGCA**GGGAGCTTGGCATGAGAAAC**~TGGGGCCAGACTGAGCAC**GGGAGCTTGGCATGAGAAAC**~TGGGGCCAGACTGAGCAC**GGGAGCTTGGCATGAGAAAC**~TGGGGCCAGACTGAGCAC**TGATGGCAGAGAAAGGAAG**

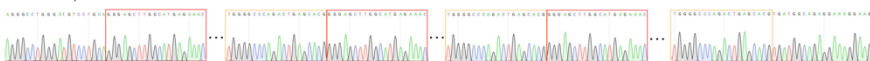

HEK3 TD 397-bp 2×TD

TD reference sequence: AGGAGGGAGCCTGGCCCTTCA**GGTCTGAGCTCAACAGAGGA**~ACATAAGACAATGGATAC**GGTCTGAGCTCAACAGAGGA**~ACATAAGACAATGGATAC**TGGAGGGTTAAGCCATGCC**

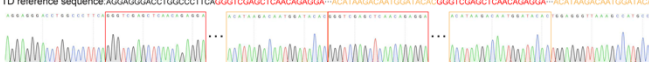

HEK3 TD 499-bp 2×TD

TD reference sequence: TAGTATGTGCAGCTCTGCA**CCGGGATCTGGTTGACAAG**~ACATAAGACAATGGATAC**CCGGGATCTGGTTGACAAG**~ACATAAGACAATGGATAC**TGGAGGGTTAAGCCATGCC**

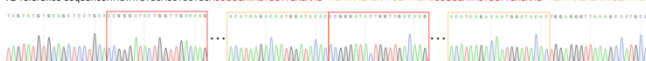

**Supplemental Fig. S9** Representative Sanger sequencing results of large fragment TDs at the *HEK3* site (related to Fig. 3A). Representative Sanger sequencing results of TD containing amplicons derived from 4 targeted TDs at *HEK3* site. The amplicons containing targeted TDs were gel-purified and subjected to Sanger sequencing. TD reference sequence was shown on top of each sequencing chromatogram, with sequences corresponding to each end of the TD boxed in red and yellow respectively. *HEK3* TD 136-bp 3×TD and 4×TD and *HEK3* TD 222-bp 3×TD were the sequencing results of the bands marked by red stars (\*) at the *HEK3* site in Fig. 3A.

A

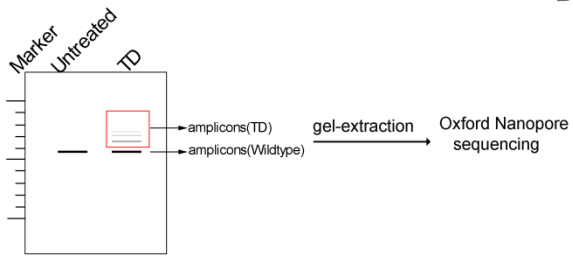

B

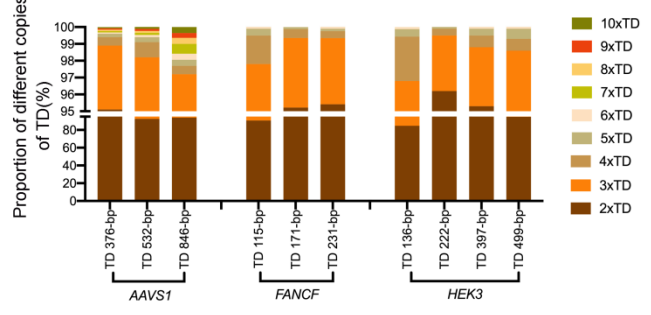



**Supplemental Fig. S10** Proportions of different copies of TDs were analyzed by Oxford Nanopore sequencing. (A) Diagram showing the procedure to prepare Oxford Nanopore sequencing Samples. The amplicons with size equivalent to or larger than  $2\times$ TD were collected and gel extracted for Nanopore sequencing. (B) The proportions of each type of TDs were analyzed.

A

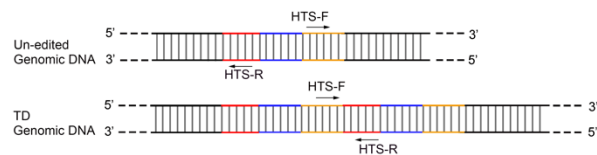

B

## AAVS1 TD 376-bp

TD reference sequence: .....TCCCTCCACCCACAGTGGGGCCACTAGGGACAGGTACCCCGTCTCCCTGGCTTTAGCCACCTCTCCA ..... reads / total reads

2 × TD ( Accurate ) : .....TCCCTCCACCCACAGTGGGGCCACTAGGGACAGGTACCCCGTCTCCCTGGCTTTAGCCACCTCTCCA ..... 321892/604583 (99.98%)

2 × TD with insertion : .....TCCCTCCACCCACAGTGGGGCCACTAGGGACAGGTACCCCGTCTCCCTGGCTTTAGCCACCTCTCCA**CTCTCCCTGGCTTTAGCCACCTCTCCA**CTCTGGCT ..... 72/604583 (0.02%)

32 bp

## AAVS1 TD 532-bp

TD reference sequence: .....TCCCTCCACCCACAGTGGGGCCACTAGGGACAGGCGCTTCACTCGCTGGGTCCCTTTCTCTCCCTCTCTCTG ..... reads / total reads

2 × TD ( Accurate ) : .....TCCCTCCACCCACAGTGGGGCCACTAGGGACAGGCGCTTCACTCGCTGGGTCCCTTTCTCTCCCTCTCTCTG ..... 448929/447308 (99.92%)

2 × TD with insertion : .....TTATCTGTCCCTCCACCCACAGTGGGGCCACTAGGGACAGGCGCTTCACTCGCTGGGTCCCTTTCTCTCTCTCTG**ATCTGTCCCTCCACCCACAGTGGGGCCACTAGGGACAGGCGCTTCACTCGCTGGGTCCCTTTCTCTCTCTG**GGG ..... 273/447308 (0.06%)

82 bp

106/447308 (0.02%)

## AAVS1 TD 846-bp

TD reference sequence: .....TTATCTGTCCCTCCACCCACAGTGGGGCCACTAGGGACAGGCGCTTCACTCGCTGGGTCCCTTTCTCTCTCTG ..... reads / total reads

2 × TD ( Accurate ) : .....TTATCTGTCCCTCCACCCACAGTGGGGCCACTAGGGACAGGCGCTTCACTCGCTGGGTCCCTTTCTCTCTCTG ..... 604109/604583 (99.92%)

2 × TD with insertion : .....TTATCTGTCCCTCCACCCACAGTGGGGCCACTAGGGACAGGCGCTTCACTCGCTGGGTCCCTTTCTCTCTCTG**ATCTGTCCCTCCACCCACAGTGGGGCCACTAGGGACAGGCGCTTCACTCGCTGGGTCCCTTTCTCTCTCTG**GGG ..... 47/604583 (0.08%)

82 bp

**Supplemental Fig.S11** Undesired edits of the *AAVSI* site were determined by HTS. (A) PCR strategy for amplifying the junction of TDs. The primers were designed to specifically amplify the boundary of targeted TDs. The HTS primers were listed in Supplemental Table S5.

(B) Undesired edits in indicated TDs of the *AAVSI* site. Sequence corresponding to accurate TD allele was shown on top of each analysis. The sequences corresponding to each end of the TD were showed in red and yellow respectively. The red arrowhead pointed to the boundary of the duplication. Insertion and base substitution were indicated by red box and green letters respectively. Note that the inserted sequence was same as its 5' upstream sequence. Sequences with a ratio over 0.02% were shown.

## EMX1 TD 116-bp

| TD reference sequence: . . . . . CTGGAGGAGGAAGGGCCTGAGTCCGAGCAGAAGAA |                                     | TTCTCATCTGTGCCCTCCCTCCCTGGCCACAGGT . . . . . | reads / total reads   |
|----------------------------------------------------------------------|-------------------------------------|----------------------------------------------|-----------------------|
| 2 × TD ( Accurate ) :                                                | CTGGAGGAGGAAGGGCCTGAGTCCGAGCAGAAGAA | TTCTCATCTGTGCCCTCCCTCCCTGGCCACAGGT . . . . . | 39852/ 41510 (96.01%) |
| 2 × TD with insertion :                                              | CTGGAGGAGGAAGGGCCTGAGTCCGAGCAGAAGAA | TTCTCATCTGTGCCCTCCCTCCCTGGCCACAGGT . . . . . | 786/41510 (1.90%)     |
|                                                                      | CTGGAGGAGGAAGGGCCTGAGTCCGAGCAGAAGAA | TTCTCATCTGTGCCCTCCCTCCCTGGCCACAGGT . . . . . | 480/41510 (1.16%)     |
|                                                                      | CTGGAGGAGGAAGGGCCTGAGTCCGAGCAGAAGAA | TTCTCATCTGTGCCCTCCCTCCCTGGCCACAGGT . . . . . | 704/41510 (0.17%)     |
|                                                                      | CTGGAGGAGGAAGGGCCTGAGTCCGAGCAGAAGAA | TTCTCATCTGTGCCCTCCCTCCCTGGCCACAGGT . . . . . | 65/41510 (0.16%)      |
|                                                                      | CTGGAGGAGGAAGGGCCTGAGTCCGAGCAGAAGAA | TTCTCATCTGTGCCCTCCCTCCCTGGCCACAGGT . . . . . | 51/41510 (0.12%)      |
|                                                                      | CTGGAGGAGGAAGGGCCTGAGTCCGAGCAGAAGAA | TTCTCATCTGTGCCCTCCCTCCCTGGCCACAGGT . . . . . | 47/41510 (0.11%)      |
|                                                                      | CTGGAGGAGGAAGGGCCTGAGTCCGAGCAGAAGAA | TTCTCATCTGTGCCCTCCCTCCCTGGCCACAGGT . . . . . | 46/41510 (0.11%)      |
|                                                                      | CTGGAGGAGGAAGGGCCTGAGTCCGAGCAGAAGAA | TTCTCATCTGTGCCCTCCCTCCCTGGCCACAGGT . . . . . | 36/41510 (0.087%)     |
|                                                                      | CTGGAGGAGGAAGGGCCTGAGTCCGAGCAGAAGAA | TTCTCATCTGTGCCCTCCCTCCCTGGCCACAGGT . . . . . | 35/41510 (0.084%)     |
|                                                                      | CTGGAGGAGGAAGGGCCTGAGTCCGAGCAGAAGAA | TTCTCATCTGTGCCCTCCCTCCCTGGCCACAGGT . . . . . | 22/41510 (0.053%)     |
|                                                                      | CTGGAGGAGGAAGGGCCTGAGTCCGAGCAGAAGAA | TTCTCATCTGTGCCCTCCCTCCCTGGCCACAGGT . . . . . | 22/41510 (0.053%)     |
|                                                                      | CTGGAGGAGGAAGGGCCTGAGTCCGAGCAGAAGAA | TTCTCATCTGTGCCCTCCCTCCCTGGCCACAGGT . . . . . | 21/41510 (0.051%)     |
|                                                                      | CTGGAGGAGGAAGGGCCTGAGTCCGAGCAGAAGAA | TTCTCATCTGTGCCCTCCCTCCCTGGCCACAGGT . . . . . | 20/41510 (0.048%)     |
|                                                                      | CTGGAGGAGGAAGGGCCTGAGTCCGAGCAGAAGAA | TTCTCATCTGTGCCCTCCCTCCCTGGCCACAGGT . . . . . | 20/41510 (0.048%)     |
|                                                                      | CTGGAGGAGGAAGGGCCTGAGTCCGAGCAGAAGAA | TTCTCATCTGTGCCCTCCCTCCCTGGCCACAGGT . . . . . | 20/41510 (0.048%)     |
|                                                                      | CTGGAGGAGGAAGGGCCTGAGTCCGAGCAGAAGAA | TTCTCATCTGTGCCCTCCCTCCCTGGCCACAGGT . . . . . | 19/41510 (0.046%)     |
|                                                                      | CTGGAGGAGGAAGGGCCTGAGTCCGAGCAGAAGAA | TTCTCATCTGTGCCCTCCCTCCCTGGCCACAGGT . . . . . | 17/41510 (0.041%)     |
|                                                                      | CTGGAGGAGGAAGGGCCTGAGTCCGAGCAGAAGAA | TTCTCATCTGTGCCCTCCCTCCCTGGCCACAGGT . . . . . | 16/41510 (0.039%)     |
|                                                                      | CTGGAGGAGGAAGGGCCTGAGTCCGAGCAGAAGAA | TTCTCATCTGTGCCCTCCCTCCCTGGCCACAGGT . . . . . | 16/41510 (0.039%)     |
|                                                                      | CTGGAGGAGGAAGGGCCTGAGTCCGAGCAGAAGAA | TTCTCATCTGTGCCCTCCCTCCCTGGCCACAGGT . . . . . | 14/41510 (0.034%)     |
|                                                                      | CTGGAGGAGGAAGGGCCTGAGTCCGAGCAGAAGAA | TTCTCATCTGTGCCCTCCCTCCCTGGCCACAGGT . . . . . | 14/41510 (0.034%)     |
| 2 × TD with deletion :                                               | CTGGAGGAGGAAGGGCCTGAGTCCGAGCAGAAGAA | TTCTCATCTGTGCCCTCCCTCCCTGGCCACAGGT . . . . . | 26/41510 (0.063%)     |

**Supplemental Fig. S12** Undesired edits of *EMXI* TD 116-bp were determined by HTS. Sequence corresponding to accurate TD allele was shown on top of the analysis. The sequences corresponding to each end of the TD were showed in red and yellow respectively. The red arrowhead pointed to the boundary of the duplication. Deletion and insertion were indicated by black dash and red box. Note that the inserted sequence was the same as its 5' upstream sequence. The inserted sequences that were likely derived from sgRNA scaffold were highlighted in blue. Sequences with a ratio over 0.02% were shown.

EMX1 TD 201-bp

|                                                                |  | Insertion                                |                         |
|----------------------------------------------------------------|--|------------------------------------------|-------------------------|
| TD reference sequence:.....CTGGAGGAGGAAGGGCCTGAGTCCGAGCAGAAGAA |  |                                          |                         |
| 2 × TD ( Accurate ) : .....                                    |  | CCCTATGTAGCCTCAGTCTTCCCATCAGGCTCTCA..... | reads / total reads     |
| 2 × TD with insertion : .....                                  |  | CCCTATGTAGCCTCAGTCTTCCCATCAGGCTCTCA..... | 519489/ 524263 (99.09%) |
| .....CTGGAGGAGGAAGGGCCTGAGTCCGAGCAGAAGAA                       |  | CCCTATGTAGCCTCAGTCTTCCCATCAGGCTCTCA..... | 1620/524263 (0.31%)     |
| .....CTGGAGGAGGAAGGGCCTGAGTCCGAGCAGAAGAA                       |  | CCCTATGTAGCCTCAGTCTTCCCATCAGGCTCTCA..... | 1408/524263 (0.27%)     |
| .....CTGGAGGAGGAAGGGCCTGAGTCCGAGCAGAAGAA                       |  | CCCTATGTAGCCTCAGTCTTCCCATCAGGCTCTCA..... | 327/524263 (0.062%)     |
| .....CTGGAGGAGGAAGGGCCTGAGTCCGAGCAGAAGAA                       |  | CCCTATGTAGCCTCAGTCTTCCCATCAGGCTCTCA..... | 308/524263 (0.059%)     |
| .....CTGGAGGAGGAAGGGCCTGAGTCCGAGCAGAAGAA                       |  | CCCTATGTAGCCTCAGTCTTCCCATCAGGCTCTCA..... | 203/524263 (0.039%)     |
| .....CTGGAGGAGGAAGGGCCTGAGTCCGAGCAGAAGAA                       |  | CCCTATGTAGCCTCAGTCTTCCCATCAGGCTCTCA..... | 146/524263 (0.028%)     |
| .....CTGGAGGAGGAAGGGCCTGAGTCCGAGCAGAAGAA                       |  | CCCTATGTAGCCTCAGTCTTCCCATCAGGCTCTCA..... | 143/524263 (0.027%)     |
| .....CTGGAGGAGGAAGGGCCTGAGTCCGAGCAGAAGAA                       |  | CCCTATGTAGCCTCAGTCTTCCCATCAGGCTCTCA..... | 136/524263 (0.026%)     |
| .....CTGGAGGAGGAAGGGCCTGAGTCCGAGCAGAAGAA                       |  | CCCTATGTAGCCTCAGTCTTCCCATCAGGCTCTCA..... | 132/524263 (0.025%)     |
| .....CTGGAGGAGGAAGGGCCTGAGTCCGAGCAGAAGAA                       |  | CCCTATGTAGCCTCAGTCTTCCCATCAGGCTCTCA..... | 127/524263 (0.024%)     |
| .....CTGGAGGAGGAAGGGCCTGAGTCCGAGCAGAAGAA                       |  | CCCTATGTAGCCTCAGTCTTCCCATCAGGCTCTCA..... | 115/524263 (0.022%)     |
| .....CTGGAGGAGGAAGGGCCTGAGTCCGAGCAGAAGAA                       |  | CCCTATGTAGCCTCAGTCTTCCCATCAGGCTCTCA..... | 109/524263 (0.021%)     |

**Supplemental Fig. S13** Undesired edits of *EMXI* TD 201-bp were determined by HTS.

Sequences corresponding to accurate TD allele was shown on top of the analysis. The sequences corresponding to each end of the TD were showed in red and yellow respectively. The red arrowhead pointed to the boundary of the duplication. Insertions was indicated by red boxes. Note that most inserted sequences were same as their 5' upstream sequences. A small group of insertions that were likely derived from sgRNA scaffold were highlighted in blue. Sequences with a ratio over 0.02% were shown.

- Deletion     Insertion

| D reference sequence:                                                   | reads / total reads      |
|-------------------------------------------------------------------------|--------------------------|
| 2 × TD ( Accurate ) :                                                   | 207814 / 210165 (98.88%) |
| 2 × TD with insertion :                                                 |                          |
| CTGGAGGAGGAAGGGCCTGAGTCCGAGCAGAAGAATTCCTCTG GCCCACTGTGCTCTTCTG GCGCTG   | 7432/210165 (0.35%)      |
| CTGGAGGAGGAAGGGCCTGAGTCCGAGCAGAAGAATTCCTCTG GCCCACTGTGCTCTTCTG GCGCTG   | 142/210165 (0.068%)      |
| CTGGAGGAGGAAGGGCCTGAGTCCGAGCAGAAGAATTCCTCTG GCCCACTGTGCTCTTCTG GCGCTG   | 82/210165 (0.039%)       |
| CTGGAGGAGGAAGGGCCTGAGTCCGAGCAGAAGAATTCCTCTG GCCCACTGTGCTCTTCTG GCGCTG   | 69/210165 (0.033%)       |
| CTGGAGGAGGAAGGGCCTGAGTCCGAGCAGAAGAATTCCTCTG GCCCACTGTGCTCTTCTG GCGCTG   | 60/210165 (0.029%)       |
| CTGGAGGAGGAAGGGCCTGAGTCCGAGCAGAAGAATTCCTCTG GCCCACTGTGCTCTTCTG GCGCTG   | 58/210165 (0.028%)       |
| CTGGAGGAGGAAGGGCCTGAGTCCGAGCAGAAGAATTCCTCTG GCCCACTGTGCTCTTCTG GCGCTG   | 51/210165 (0.024%)       |
| 2 × TD with deletion :                                                  |                          |
| CTGGAGGAGGAAGGGCCTGAGTCCGA - CAGAAGAATTCCTCTG GCCCACTGTGCTCTTCTG GCGCTG | 337/210165 (0.16%)       |
| CTGGAGGAGGAAGGGCCT - AGTCCGAGCAGAAGAATTCCTCTG GCCCACTGTGCTCTTCTG GCGCTG | 153/210165 (0.073%)      |
| CTGGAGGAGGAAGGGCCTGAGTCCGAGCAGAAGAATTCCTCT - GGCCCACTGTGCTCTTCTG GCGCTG | 125/210165 (0.059%)      |
| CTGGAGGAGGAAGGGCCTGAGTCCG - GCAGAAGAATTCCTCTG GCCCACTGTGCTCTTCTG GCGCTG | 125/210165 (0.059%)      |
| CTGGAGGAGGA - GCGCTGAGTCCGAGCAGAAGAATTCCTCTG GCCCACTGTGCTCTTCTG GCGCTG  | 124/210165 (0.059%)      |
| CTGGAGGAG - AGCGGCTGAGCAGAAGAAGAATTCCTCTG GCCCACTGTGCTCTTCTG GCGCTG     | 94/210165 (0.045%)       |
| CTGGAGGAG - AGCGGCTGAGCAGAAGAAGAATTCCTCTG GCCCACTGTGCTCTTCTG GCGCTG     | 79/210165 (0.038%)       |
| CTGGAGGA - GGCGCTGAGTCCGAGCAGAAGAATTCCTCTG GCCCACTGTGCTCTTCTG GCGCTG    | 58/210165 (0.028%)       |
| CTGG - AGGAAGGGCCTGAGTCCGAGCAGAAGAATTCCTCTG GCCCACTGTGCTCTTCTG GCGCTG   | 51/210165 (0.024%)       |



**Supplemental Fig. S14** Undesired edits of *EMXI* TD 307-bp were determined by HTS.

Sequence corresponding to accurate TD allele was shown on top of each analysis. The sequences corresponding to each end of the TD were showed in red and yellow respectively. The red arrowhead pointed to the boundary of the duplication. Deletion, insertion and base substitution were indicated by black dash, red box and green letters respectively. The inserted sequence in the red box was same as with its 5' upstream sequence. The sequences with a ratio over 0.02% were shown.

[illegible]

**Supplemental Fig. S15** Undesired edits of *FANCF* TD 115-bp were determined by HTS.

Sequence corresponding to accurate TD allele was shown on top of the analysis. The sequences corresponding to each end of the TD were showed in red and yellow respectively. The red arrowhead pointed to the boundary of the duplication. Deletion, insertion and base substitution were indicated by black dash, red box and green letters respectively. Note that the inserted sequence in red box was same as its 5' upstream sequence. A small group of insertions that were likely derived from sgRNA scaffold were highlighted in blue. The sequences with a ratio over 0.02% were shown.

- Deletion     Insertion

| Reference sequence: . . . . . GGCCCTTCGGCGACCTCATGGAATCCCTCTTCGCAGCGTCAAGGAACACGGGATAAAGACGCTGGGAGATTGA. . . . .     | reads / total reads    |
|----------------------------------------------------------------------------------------------------------------------|------------------------|
| 2 × TD ( Accurate ) : . . . . . GGCCCTTCGGCGACCTCATGGAATCCCTCTTCGCAGCGTCAAGGAACACGGGATAAAGACGCTGGGAGATTGA. . . . .   | 197338/208725 (94.54%) |
| 2 × TD with insertion : . . . . . GGCCCTTCGGCGACCTCATGGAATCCCTCTTCGCAGCGTCAAGGAACACGGGATAAAGACGCTGGGAGATTGA. . . . . | 971/208725 (0.47%)     |
| . . . . . GGCCCTTCGGCGACCTCATGGAATCCCTCTTCGCAGCGTCAAGGAACACGGGATAAAGACGCTGGGAGATTGA. . . . .                         | 829/208725 (0.40%)     |
| . . . . . GGCCCTTCGGCGACCTCATGGAATCCCTCTTCGCAGCGTCAAGGAACACGGGATAAAGACGCTGGGAGATTGA. . . . .                         | 399/208725 (0.19%)     |
| . . . . . GGCCCTTCGGCGACCTCATGGAATCCCTCTTCGCAGCGTCAAGGAACACGGGATAAAGACGCTGGGAGATTGA. . . . .                         | 341/208725 (0.16%)     |
| . . . . . GGCCCTTCGGCGACCTCATGGAATCCCTCTTCGCAGCGTCAAGGAACACGGGATAAAGACGCTGGGAGATTGA. . . . .                         | 298/208725 (0.14%)     |
| . . . . . GGCCCTTCGGCGACCTCATGGAATCCCTCTTCGCAGCGTCAAGGAACACGGGATAAAGACGCTGGGAGATTGA. . . . .                         | 233/208725 (0.11%)     |
| . . . . . GGCCCTTCGGCGACCTCATGGAATCCCTCTTCGCAGCGTCAAGGAACACGGGATAAAGACGCTGGGAGATTGA. . . . .                         | 212/208725 (0.10%)     |
| . . . . . GGCCCTTCGGCGACCTCATGGAATCCCTCTTCGCAGCGTCAAGGAACACGGGATAAAGACGCTGGGAGATTGA. . . . .                         | 182/208725 (0.087%)    |
| . . . . . GGCCCTTCGGCGACCTCATGGAATCCCTCTTCGCAGCGTCAAGGAACACGGGATAAAGACGCTGGGAGATTGA. . . . .                         | 128/208725 (0.062%)    |
| . . . . . GGCCCTTCGGCGACCTCATGGAATCCCTCTTCGCAGCGTCAAGGAACACGGGATAAAGACGCTGGGAGATTGA. . . . .                         | 128/208725 (0.061%)    |
| . . . . . GGCCCTTCGGCGACCTCATGGAATCCCTCTTCGCAGCGTCAAGGAACACGGGATAAAGACGCTGGGAGATTGA. . . . .                         | 122/208725 (0.058%)    |
| . . . . . GGCCCTTCGGCGACCTCATGGAATCCCTCTTCGCAGCGTCAAGGAACACGGGATAAAGACGCTGGGAGATTGA. . . . .                         | 112/208725 (0.054%)    |
| . . . . . GGCCCTTCGGCGACCTCATGGAATCCCTCTTCGCAGCGTCAAGGAACACGGGATAAAGACGCTGGGAGATTGA. . . . .                         | 102/208725 (0.049%)    |
| . . . . . GGCCCTTCGGCGACCTCATGGAATCCCTCTTCGCAGCGTCAAGGAACACGGGATAAAGACGCTGGGAGATTGA. . . . .                         | 94/208725 (0.045%)     |
| . . . . . GGCCCTTCGGCGACCTCATGGAATCCCTCTTCGCAGCGTCAAGGAACACGGGATAAAGACGCTGGGAGATTGA. . . . .                         | 86/208725 (0.041%)     |
| . . . . . GGCCCTTCGGCGACCTCATGGAATCCCTCTTCGCAGCGTCAAGGAACACGGGATAAAGACGCTGGGAGATTGA. . . . .                         | 82/208725 (0.039%)     |
| . . . . . GGCCCTTCGGCGACCTCATGGAATCCCTCTTCGCAGCGTCAAGGAACACGGGATAAAGACGCTGGGAGATTGA. . . . .                         | 82/208725 (0.039%)     |
| . . . . . GGCCCTTCGGCGACCTCATGGAATCCCTCTTCGCAGCGTCAAGGAACACGGGATAAAGACGCTGGGAGATTGA. . . . .                         | 71/208725 (0.034%)     |
| . . . . . GGCCCTTCGGCGACCTCATGGAATCCCTCTTCGCAGCGTCAAGGAACACGGGATAAAGACGCTGGGAGATTGA. . . . .                         | 69/208725 (0.033%)     |
| . . . . . GGCCCTTCGGCGACCTCATGGAATCCCTCTTCGCAGCGTCAAGGAACACGGGATAAAGACGCTGGGAGATTGA. . . . .                         | 67/208725 (0.032%)     |
| . . . . . GGCCCTTCGGCGACCTCATGGAATCCCTCTTCGCAGCGTCAAGGAACACGGGATAAAGACGCTGGGAGATTGA. . . . .                         | 66/208725 (0.032%)     |
| . . . . . GGCCCTTCGGCGACCTCATGGAATCCCTCTTCGCAGCGTCAAGGAACACGGGATAAAGACGCTGGGAGATTGA. . . . .                         | 64/208725 (0.031%)     |
| . . . . . GGCCCTTCGGCGACCTCATGGAATCCCTCTTCGCAGCGTCAAGGAACACGGGATAAAGACGCTGGGAGATTGA. . . . .                         | 63/208725 (0.030%)     |
| . . . . . GGCCCTTCGGCGACCTCATGGAATCCCTCTTCGCAGCGTCAAGGAACACGGGATAAAGACGCTGGGAGATTGA. . . . .                         | 62/208725 (0.030%)     |
| . . . . . GGCCCTTCGGCGACCTCATGGAATCCCTCTTCGCAGCGTCAAGGAACACGGGATAAAGACGCTGGGAGATTGA. . . . .                         | 61/208725 (0.029%)     |
| . . . . . GGCCCTTCGGCGACCTCATGGAATCCCTCTTCGCAGCGTCAAGGAACACGGGATAAAGACGCTGGGAGATTGA. . . . .                         | 54/208725 (0.026%)     |
| 2 × TD with deletion : . . . . . GGCCCTTCGGCGACCTCATGGAATCCCTCTTCGCAGCGTCAAGGAACACGGGATAAAGACGCTGGGAGATTGA. . . . .  | 5977/208725 (2.86%)    |
| . . . . . GGCCCTTCGGCGACCTCATGGAATCCCTCTTCGCAGCGTCAAGGAACACGGGATAAAGACGCTGGGAGATTGA. . . . .                         | 154/208725 (0.074%)    |
| . . . . . GGCCCTTCGGCGACCTCATGGAATCCCTCTTCGCAGCGTCAAGGAACACGGGATAAAGACGCTGGGAGATTGA. . . . .                         | 146/208725 (0.070%)    |
| . . . . . GGCCCTTCGGCGACCTCATGGAATCCCTCTTCGCAGCGTCAAGGAACACGGGATAAAGACGCTGGGAGATTGA. . . . .                         | 89/208725 (0.043%)     |
| . . . . . GGCCCTTCGGCGACCTCATGGAATCCCTCTTCGCAGCGTCAAGGAACACGGGATAAAGACGCTGGGAGATTGA. . . . .                         | 75/208725 (0.036%)     |
| . . . . . GGCCCTTCGGCGACCTCATGGAATCCCTCTTCGCAGCGTCAAGGAACACGGGATAAAGACGCTGGGAGATTGA. . . . .                         | 54/208725 (0.026%)     |
| . . . . . GGCCCTTCGGCGACCTCATGGAATCCCTCTTCGCAGCGTCAAGGAACACGGGATAAAGACGCTGGGAGATTGA. . . . .                         | 51/208725 (0.024%)     |

**Supplemental Fig. S16** Undesired edits of *FANCF* TD 171-bp were determined by HTS.

Sequence corresponding to accurate TD allele was shown on top of the analysis. The sequences corresponding to each end of the TD were showed in red and yellow respectively. The red arrowhead pointed to the boundary of the duplication. Deletion, insertion and base substitution were indicated by black dash, red box and green letters respectively. Note that most inserted sequences were same as their 5' upstream sequences. A small group of insertions that were likely derived from sgRNA scaffold were highlighted in blue. The sequences with a ratio over 0.02% were shown.

| TD reference sequence: .....  | reads / total reads    |
|-------------------------------|------------------------|
| 2 × TD ( Accurate ) : .....   | 317231/330088 (96.10%) |
| 2 × TD with insertion : ..... | 989/330088 (0.30%)     |
| .....                         | 762/330088 (0.23%)     |
| .....                         | 684/330088 (0.21%)     |
| .....                         | 677/330088 (0.21%)     |
| .....                         | 780/330088 (0.24%)     |
| .....                         | 553/330088 (0.17%)     |
| .....                         | 358/330088 (0.11%)     |
| .....                         | 350/330088 (0.11%)     |
| .....                         | 319/330088 (0.10%)     |
| .....                         | 295/330088 (0.089%)    |
| .....                         | 255/330088 (0.077%)    |
| .....                         | 252/330088 (0.076%)    |
| .....                         | 244/330088 (0.074%)    |
| .....                         | 223/330088 (0.068%)    |
| .....                         | 219/330088 (0.065%)    |
| .....                         | 212/330088 (0.064%)    |
| .....                         | 203/330088 (0.061%)    |
| .....                         | 198/330088 (0.060%)    |
| .....                         | 175/330088 (0.053%)    |
| .....                         | 172/330088 (0.052%)    |
| .....                         | 167/330088 (0.051%)    |
| .....                         | 164/330088 (0.050%)    |
| .....                         | 161/330088 (0.049%)    |
| .....                         | 157/330088 (0.048%)    |
| .....                         | 146/330088 (0.044%)    |
| .....                         | 145/330088 (0.044%)    |
| .....                         | 136/330088 (0.041%)    |
| .....                         | 135/330088 (0.041%)    |
| .....                         | 135/330088 (0.041%)    |
| .....                         | 134/330088 (0.041%)    |
| .....                         | 124/330088 (0.038%)    |
| .....                         | 123/330088 (0.037%)    |
| .....                         | 121/330088 (0.037%)    |
| .....                         | 119/330088 (0.036%)    |
| .....                         | 115/330088 (0.035%)    |
| .....                         | 109/330088 (0.033%)    |
| .....                         | 107/330088 (0.032%)    |
| .....                         | 106/330088 (0.032%)    |
| .....                         | 104/330088 (0.032%)    |
| .....                         | 102/330088 (0.031%)    |
| .....                         | 101/330088 (0.031%)    |
| .....                         | 97/330088 (0.029%)     |
| .....                         | 95/330088 (0.028%)     |
| .....                         | 93/330088 (0.028%)     |
| .....                         | 92/330088 (0.028%)     |
| .....                         | 89/330088 (0.027%)     |
| .....                         | 87/330088 (0.026%)     |
| .....                         | 86/330088 (0.026%)     |
| .....                         | 85/330088 (0.026%)     |
| .....                         | 84/330088 (0.025%)     |
| .....                         | 83/330088 (0.025%)     |
| .....                         | 81/330088 (0.025%)     |
| .....                         | 76/330088 (0.023%)     |
| .....                         | 74/330088 (0.022%)     |
| .....                         | 73/330088 (0.022%)     |
| 2 × TD with deletion : .....  | 170/330088 (0.052%)    |
| .....                         | 161/330088 (0.049%)    |
| .....                         | 148/330088 (0.045%)    |
| .....                         | 138/330088 (0.041%)    |
| .....                         | 115/330088 (0.035%)    |
| .....                         | 84/330088 (0.025%)     |

**Supplemental Fig. S17** Undesired edits of *FANCF* TD 231-bp were determined by HTS.

Sequence corresponding to accurate TD allele was shown on top of the analysis. The sequences corresponding to each end of the TD were showed in red and yellow respectively. The red arrowhead pointed to the boundary of the duplication. Deletion, insertion and base substitution were indicated by black dash, red box and green letters respectively. Note that most inserted sequences were same as their 5' upstream sequences. A small group of insertions that were likely derived from sgRNA scaffold were highlighted in blue. The sequences with a ratio over 0.02% were shown.

 Insertion



**Supplemental Fig. S18** Undesired edits of *HEK3* TD 136-bp were determined by HTS.

Sequence corresponding to accurate TD allele was shown on top of the analysis. The sequences corresponding to each end of the TD were showed in red and yellow respectively. The red arrowhead pointed to the boundary of the duplication. Insertion and base substitution were indicated by red box and green letters respectively. Note that most inserted sequences were same as their 5' upstream sequences. A small group of insertions that were likely derived from sgRNA scaffold were highlighted in blue. The sequences with a ratio over 0.02% were shown.

HEK3 TD 222-bp

|                                                                                                                 |                                                                                                                                                                                                          |       | - Deletion <span style="border: 1px solid red;"> </span> Insertion |  |
|-----------------------------------------------------------------------------------------------------------------|----------------------------------------------------------------------------------------------------------------------------------------------------------------------------------------------------------|-------|--------------------------------------------------------------------|--|
| TD reference sequence:.....CCCTGGCCTGGGTCAATCCTTGGGGCCAGACTGAGCACGGGGAGCTTGGCATGAGAAACCTTGGAGAGTTTAAAGCAAG..... |                                                                                                                                                                                                          |       | reads / total reads                                                |  |
| 2 × TD ( Accurate ) :                                                                                           | .....CCCTGGCCTGGGTCAATCCTTGGGGCCAGACTGAGCACGGGGAGCTTGGCATGAGAAACCTTGGAGAGTTTAAAGCAAG.....                                                                                                                |       | 149318/ 151942 (98.27%)                                            |  |
| 2 × TD with insertion :                                                                                         | .....CCCTGGCCTGGGTCAATCCTTGGGGCCAGACTGAGCA <span style="border: 1px solid red;">TCCCTTGGGGCCAGACTGAGCA</span> CGGGAGCTTGGCATGAGAAACCTTGGAGAGTTTAAAGCAAG.....                                             | 22-bp | 618/151942 (0.41%)                                                 |  |
|                                                                                                                 | .....CCCTGGCCTGGGTCAATCCTTGGGGCCAGACTGAGCACGGGGAGCTTGGCATGAGAA <span style="border: 1px solid red;">TCCCTTGGGGCCAGACTGAGCACGGGGAGCTTGGCATGAGAA</span> ACCTTGGAGAGTTTAAAGCAAG.....                        | 42-bp | 452/151942 (0.30%)                                                 |  |
|                                                                                                                 | .....CCCTGGCCTGGGTCAATCCTTGGGGCCAGACTGAGCACGGGGAGCTTGGCATGAGAAACCTTGG <span style="border: 1px solid red;">GGCCAGACTGAGCACGGGGAGCTTGGCATGAGAAACCTTGG</span> AGAGTTTAAAGCAAG.....                         | 42-bp | 394/151942 (0.26%)                                                 |  |
|                                                                                                                 | .....CCCTGGCCTGGGTCAATCCTTGGGGCCAGACTGAGCACGGGGAGCTTGGCATGAGAAACCTTGG <span style="border: 1px solid red;">ATCCTTGGGGCCAGACTGAGCACGGGGAGCTTGGCATGAGAAACCTTGG</span> SAGAGTTT.....                        | 50-bp | 173/151942 (0.11%)                                                 |  |
|                                                                                                                 | .....CCCTGGCCTGGGTCAATCCTTGGGGCCAGACT <span style="border: 1px solid red;">TGGGGCCAGACT</span> 3AGCACGGGGAGCTTGGCATGAGAAACCTTGGAGAGTTTAAAGCAAG.....                                                      | 13-bp | 114/151942 (0.075%)                                                |  |
|                                                                                                                 | .....CCCTGGCCTGGGTCAATCCTTGGGGCCAGACTGAGCA <span style="border: 1px solid red;">ATCCTTGGGGCCAGACTGAGCA</span> CGGGAGCTTGGCATGAGAAACCTTGGAGAGTTTAAAGCAAG.....                                             | 23-bp | 93/151942 (0.061%)                                                 |  |
|                                                                                                                 | .....CCCTGGCCTGGGTCAATCCTTGGGGCCAGACTGAGCAC <span style="border: 1px solid red;">GACTGAGCACG</span> GGAGCTTGGCATGAGAAACCTTGGAGAGTTTAAAGCAAG.....                                                         | 12-bp | 93/151942 (0.061%)                                                 |  |
|                                                                                                                 | .....CCCTGGCCTGGGTCAATCCTTGGGGCCAGACTGAGCACGGGGAGCTTGG <span style="border: 1px solid red;">T</span> GAGCACGGGGAGCTTGG <span style="border: 1px solid red;">CAT</span> GAGAAACCTTGGAGAGTTTAAAGCAAG.....  | 18-bp | 75/151942 (0.049%)                                                 |  |
|                                                                                                                 | .....CCCTGGCCTGGGTCAATCCTTGGGGCCAGACTGAGCACGGGGAGCTTGGCAT <span style="border: 1px solid red;">GGGCCAGACTGAGCACGGGGAGCTTGGCATG</span> AGAAACCTTGGAGAGTTTAAAGCAAG.....                                    | 32-bp | 72/151942 (0.047%)                                                 |  |
|                                                                                                                 | .....CCCTGGCCTGGGTCAATCCTTGGGGCCAGACTGAGCACGGGGAGCTTGGCATG <span style="border: 1px solid red;">ATCCTTGGGGCCAGACTGAGCACGGGGAGCTTGGCATG</span> AAACCTTGGAGAGTTTAAAGCAAG.....                              | 42-bp | 67/151942 (0.044%)                                                 |  |
|                                                                                                                 | .....CCCTGGCCTGGGTCAATCCTTGGGGCCAGACT <span style="border: 1px solid red;">ATCCTTGGGGCC</span> CA <span style="border: 1px solid red;">G</span> AGCTGAGCACGGGGAGCTTGGCATGAGAAACCTTGGAGAGTTTAAAGCAAG..... | 11-bp | 65/151942 (0.043%)                                                 |  |
|                                                                                                                 | .....CCCTGGCCTGGGTCAATCCTTGGGGCCAGACT <span style="border: 1px solid red;">TTGGGGCCAGACTGAGC</span> ACGGGGAGCTTGGCATGAGAAACCTTGGAGAGTTTAAAGCAAG.....                                                     | 18-bp | 64/151942 (0.042%)                                                 |  |
|                                                                                                                 | .....CCCTGGCCTGGGTCAATCCTTGGGGCCAGACT <span style="border: 1px solid red;">ATCCTTGGGGCCAGACT</span> TGAGCACGGGGAGCTTGGCATGAGAAACCTTGGAGAGTTTAAAGCAAG.....                                                | 17-bp | 62/151942 (0.041%)                                                 |  |
|                                                                                                                 | .....CCCTGGCCTGGGTCAATCCTTGGGGCCAGACT <span style="border: 1px solid red;">GGTGCATCCTTGGGGCCAGACT</span> TGAGCACGGGGAGCTTGGCATGAGAAACCTTGGAGAGTTTAAAGCAAG.....                                           | 22-bp | 50/151942 (0.033%)                                                 |  |
|                                                                                                                 | .....CCCTGGCCTGGGTCAATCCTTGGGGCCAGACTGAGCACGGGGAGCTTGGCATGAG <span style="border: 1px solid red;">GAGCTTGGCATGAG</span> AAACCTTGGAGAGTTTAAAGCAAG.....                                                    | 14-bp | 49/151942 (0.032%)                                                 |  |
|                                                                                                                 | .....CCCTGGCCTGGGTCAATCCTTGGGGCCAGACTGAGCA <span style="border: 1px solid red;">TCATCCTTGGGGCCAGACTGAGCA</span> CGGGAGCTTGGCATGAGAAACCTTGGAGAGTTTAAAGCAAG.....                                           | 24-bp | 48/151942 (0.030%)                                                 |  |
|                                                                                                                 | .....CCCTGGCCTGGGTCAATCCTTGGGGCCAGACTGAGCACGGGGAGCTTGGCAT <span style="border: 1px solid red;">CCTTGGGGCCAGACTGAGCACGGGGAGCTTGGCAT</span> GAGAAACCTTGGAGAGTTTAAAGCAAG.....                               | 36-bp | 43/151942 (0.028%)                                                 |  |
|                                                                                                                 | .....CCCTGGCCTGGGTCAATCCTTGGGGCCAGACTGAGCACGGGGAGCTTGG <span style="border: 1px solid red;">GGCCAGACTGAGCACGGGGAGCTTGG</span> CATGAGAAACCTTGGAGAGTTTAAAGCAAG.....                                        | 27-bp | 42/151942 (0.028%)                                                 |  |
| 2 × TD with deletion :                                                                                          | .....CCCTGGCCTGGGTCAATCCTTGGGGCCAGACT-----GAGCTTGGCATGAGAAACCTTGGAGAGTTTAAAGCAAG.....                                                                                                                    |       | 52/151942 (0.034%)                                                 |  |

**Supplemental Fig. S19** Undesired edits of *HEK3* TD 222-bp were determined by HTS.

Sequence corresponding to accurate TD allele was shown on top of the analysis. The sequences corresponding to each end of the TD were showed in red and yellow respectively. The red arrowhead pointed to the boundary of the duplication. Deletion, insertion and base substitution were indicated by black dash, red box and green letters respectively. Note that most inserted sequences were the same as their 5' upstream sequences. A small group of insertions that were likely derived from sgRNA scaffold were highlighted in blue. The sequences with a ratio over 0.02% were shown.

HEK3 TD 397-bp

|                                                                                                                 |                                                                                                                                                                       | - Deletion <span style="border: 1px solid red;"> </span> Insertion |  |
|-----------------------------------------------------------------------------------------------------------------|-----------------------------------------------------------------------------------------------------------------------------------------------------------------------|--------------------------------------------------------------------|--|
| TD reference sequence: . . . . .TCTCCCCCATGTCCTACATAAGACAATGGATACACGGGTCGAGCTCAACAGAGGAAAAGATCTCAGGGCA. . . . . |                                                                                                                                                                       | reads / total reads                                                |  |
| 2 × TD ( Accurate ) :                                                                                           | . . . . .TCTCCCCCATGTCCTACATAAGACAATGGATACACGGGTCGAGCTCAACAGAGGAAAAGATCTCAGGGCA. . . . .                                                                              | 366436/370811 (98.82%)                                             |  |
| 2 × TD with insertion :                                                                                         | . . . . .TATCTCCCCCATGTCCTACATAAGACAAT <span style="border: 1px solid red;">TCTCCCCCATGTCCTACATAAGACAAT</span> GGATACACGGGTCGAGCTCAACAGAGGAAAAGATCTCAGGGCA. . . . .   | 427/370811 (0.12%)                                                 |  |
|                                                                                                                 | . . . . .TCTCCCCCATGTCCTACATAAGACAATGGATACACGGGTCGAGCTCAACAGAGGAAAAGATCTCAGGGCA. . . . .                                                                              | 225/370811 (0.061%)                                                |  |
|                                                                                                                 | . . . . .TCTCCCCCATGTCCTACATAAGACAATGGATAC <span style="border: 1px solid red;">TCTCCCCCATGTCCTACATAAGACAATGGATAC</span> CGGTCGAGCTCAACAGAGGAAAAGATCTCAGGGCA. . . . . | 180/370811 (0.049%)                                                |  |
|                                                                                                                 | . . . . .TCTCCCCCATGTCCTACATAAGACAATGGATAC <span style="border: 1px solid red;">TCTCCCCCATGTCCTACATAAGACAATGGATAC</span> CGGTCGAGCTCAACAGAGGAAAAGATCTCAGGGCA. . . . . | 149/370811 (0.040%)                                                |  |
|                                                                                                                 | . . . . .TCTCCCCCATGTCCTACATAAGACAATGGATAC <span style="border: 1px solid red;">TCTCCCCCATGTCCTACATAAGACAATGGATAC</span> CGGTCGAGCTCAACAGAGGAAAAGATCTCAGGGCA. . . . . | 121/370811 (0.033%)                                                |  |
|                                                                                                                 | . . . . .TCTCCCCCATGTCCTACATAAGACAATGGATAC <span style="border: 1px solid red;">TCTCCCCCATGTCCTACATAAGACAATGGATAC</span> CGGTCGAGCTCAACAGAGGAAAAGATCTCAGGGCA. . . . . | 107/370811 (0.029%)                                                |  |
|                                                                                                                 | . . . . .TCTCCCCCATGTCCTACATAAGACAATGGATAC <span style="border: 1px solid red;">TCTCCCCCATGTCCTACATAAGACAATGGATAC</span> CGGTCGAGCTCAACAGAGGAAAAGATCTCAGGGCA. . . . . | 104/370811 (0.028%)                                                |  |
| 2 × TD with deletion :                                                                                          | . . . . .TCTCCCCCATGTCCTACATAAGACAATGGATACACGGGTCGAGCTCAACAGAGGAAAAGATCTCAGGGCA. . . . .                                                                              | 641/370811 (0.17%)                                                 |  |
|                                                                                                                 | . . . . .TCTCCCCCATGTCCTACATAAGACAATGGATACACGGGTCGAGCTCAACAGAGGAAAAGATCTCAGGGCA. . . . .                                                                              | 578/370811 (0.16%)                                                 |  |
|                                                                                                                 | . . . . .TCTCCCCCATGTCCTACATAAGACAATGGATACACGGGTCGAGCTCAACAGAGGAAAAGATCTCAGGGCA. . . . .                                                                              | 391/370811 (0.11%)                                                 |  |
|                                                                                                                 | . . . . .TCTCCCCCATGTCCTACATAAGACAATGGATACACGGGTCGAGCTCAACAGAGGAAAAGATCTCAGGGCA. . . . .                                                                              | 269/370811 (0.073%)                                                |  |
|                                                                                                                 | . . . . .TCTCCCCCATGTCCTACATAAGACAATGGATACACGGGTCGAGCTCAACAGAGGAAAAGATCTCAGGGCA. . . . .                                                                              | 257/370811 (0.069%)                                                |  |
|                                                                                                                 | . . . . .TCTCCCCCATGTCCTACATAAGACAATGGATACACGGGTCGAGCTCAACAGAGGAAAAGATCTCAGGGCA. . . . .                                                                              | 255/370811 (0.069%)                                                |  |
|                                                                                                                 | . . . . .TCTCCCCCATGTCCTACATAAGACAATGGATACACGGGTCGAGCTCAACAGAGGAAAAGATCTCAGGGCA. . . . .                                                                              | 232/370811 (0.063%)                                                |  |
|                                                                                                                 | . . . . .TCTCCCCCATGTCCTACATAAGACAATGGATACACGGGTCGAGCTCAACAGAGGAAAAGATCTCAGGGCA. . . . .                                                                              | 227/370811 (0.061%)                                                |  |
|                                                                                                                 | . . . . .TCTCCCCCATGTCCTACATAAGACAATGGATACACGGGTCGAGCTCAACAGAGGAAAAGATCTCAGGGCA. . . . .                                                                              | 212/370811 (0.057%)                                                |  |

**Supplemental Fig. S20** Undesired edits of *HEK3* TD 397-bp were determined by HTS.

Sequence corresponding to accurate TD allele was shown on top of the analysis. The sequences corresponding to each end of the TD were showed in red and yellow respectively. The red arrowhead pointed to the boundary of the duplication. Deletion and insertion were indicated by black dash and red box respectively. Note that most inserted sequences were same as their 5' upstream sequences. The sequences with a ratio over 0.02% were shown.

HEK3 TD 499-bp

|                         |                                                                                                               |                        |
|-------------------------|---------------------------------------------------------------------------------------------------------------|------------------------|
| TD reference sequence:  | .....ATCTCCCCCATGTCCTACATAAGACAATGGATACACCGGGGATACTGGTTGACAAGTTTGGCTGGGCTGGA.....                             | reads / total reads    |
| 2 × TD ( Accurate ) :   | .....ATCTCCCCCATGTCCTACATAAGACAATGGATACACCGGGGATACTGGTTGACAAGTTTGGCTGGGCTGGA.....                             | 410401/410732 (99.92%) |
| 2 × TD with insertion : | .....ATCTCCCCCATGTCCTACATAAGACAATATCTCCCCCATGTCCTACATAAGACAATGGATACACCGGGGATACTGGTTGACAAGTTTGGCTGGGCTGGA..... | 172/410732 (0.042%)    |
|                         | .....ATCTCCCCCATGTCCTACATAAGACAATGTCCTACATAAGACAATGGATACACCGGGGATACTGGTTGACAAGTTTGGCTGGGCTGGA.....            | 159/410732 (0.038%)    |

**Supplemental Fig. S21** Undesired edits of *HEK3* TD 499-*bp* were determined by HTS.

Sequence corresponding to accurate TD allele was shown on top of the analysis. The sequences corresponding to each end of the TD were showed in red and yellow respectively. The red arrowhead pointed to the boundary of the duplication. Insertion was indicated by red box. Note that most inserted sequences were same as their 5' upstream sequences. The sequences with a ratio over 0.02% were shown.

A

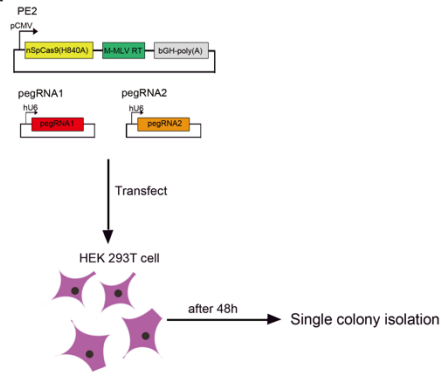

B

HEK3 TD 136-bp

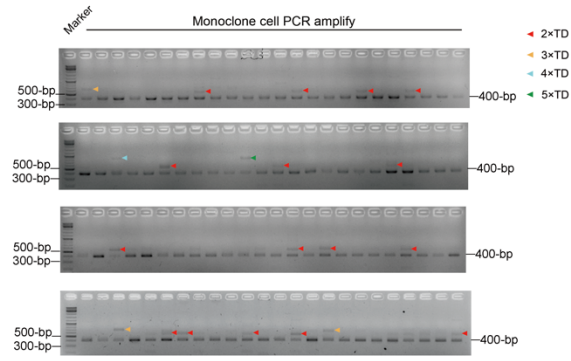

C

HEK3 TD 136-bp 2xTD

TD reference sequence: ATGGATGAGAGAAGCCTGGAGACAGGGATCCCAGGGAACG--TGGGGCCAGACTGAGCACGGACAGGGATCCCAGGGAACG--TGGGGCCAGACTGAGCACGTGATGGCAGAGAAAGGAAG

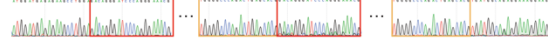

HEK3 TD 136-bp 3xTD

TD reference sequence: ATGGATGAGAGAAGCCTGGAGACAGGGATCCCAGGGAACG--TGGGGCCAGACTGAGCACGGACAGGGATCCCAGGGAACG--TGGGGCCAGACTGAGCACGTGATGGCAGAGAAAGGAAG

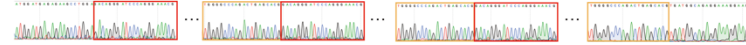

HEK3 TD 136-bp 4xTD

TD reference sequence: ATGGATGAGAGAAGCCTGGAGACAGGGATCCCAGGGAACG--TGGGGCCAGACTGAGCACGGACAGGGATCCCAGGGAACG--TGGGGCCAGACTGAGCACGTGATGGCAGAGAAAGGAAG

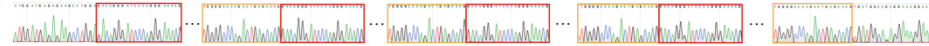

HEK3 TD 136-bp 5xTD

TD reference sequence: ATGGATGAGAGAAGCCTGGAGACAGGGATCCCAGGGAACG--TGGGGCCAGACTGAGCACGGACAGGGATCCCAGGGAACG--TGGGGCCAGACTGAGCACGTGATGGCAGAGAAAGGAAG

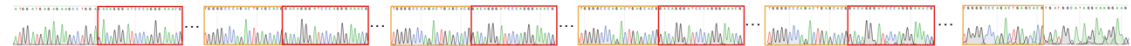



**Supplemental Fig. S22** Monoclonal analysis of the *HEK3* TD 136-bp. (A) Diagram showing the procedure of monoclonal analysis. HEK293T cells were transfected with TD-PE plasmids, including PE2 and two pegRNA, and 48 hours post the transfection cells were diluted monoclonal isolation. (B) Agarose gel electrophoresis showed the amplicons derived from each monoclonal genome. The colonies containing different copies of TDs were highlighted with triangles of different colors. (C) Sanger sequencing results of representative TDs derived from monoclonal genomes. Reference sequences of each type of TDs were shown on top of the sequence chromatogram, and the duplicated sequences corresponding to each end of the TD were marked by yellow and red boxes respectively.

**A**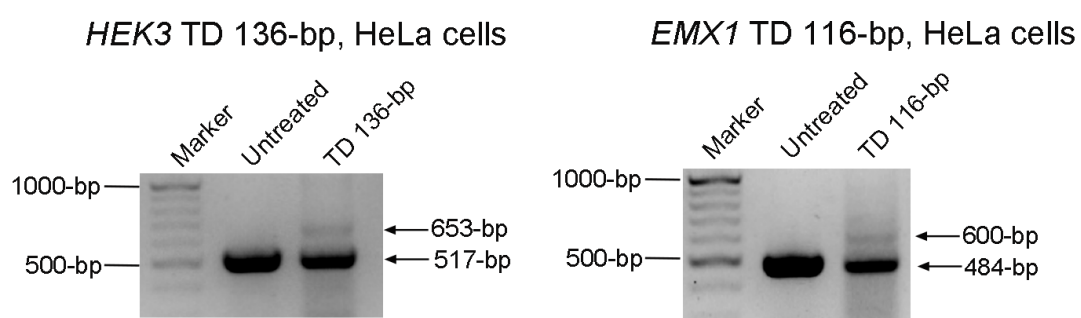**B**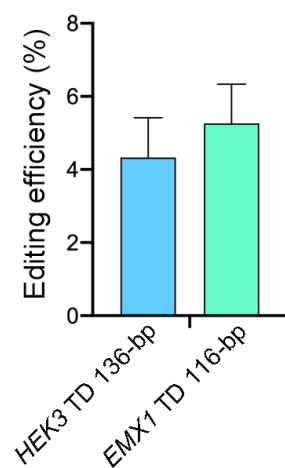

**Supplemental Fig. S23** Verification of TD-PE strategy in HeLa cells. (A) Agarose gel analysis of the presence of targeted tandem duplication at indicated loci. (B) Quantification of the efficiency of targeted tandem duplication in (A) using Image J. Values and error bars reflect mean $\pm$  s.d. of n=3 independent biological replicates.

A

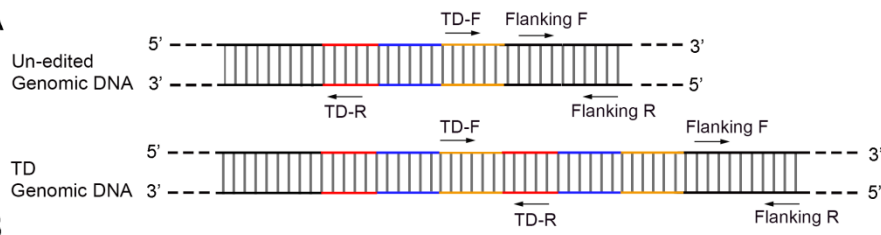

B

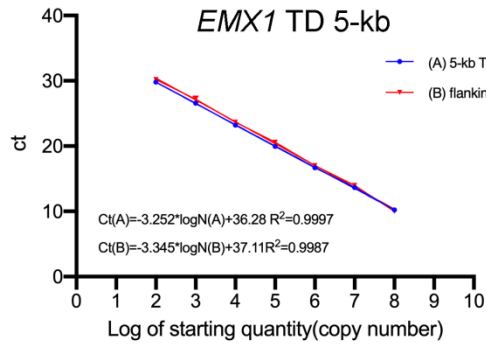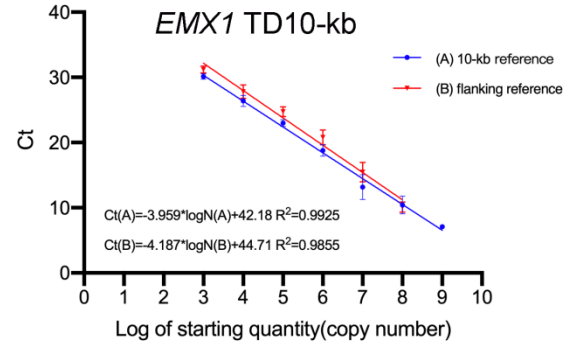

**Supplemental Fig. S24** Standard curves for absolute quantification by real-time PCR of *EMXI* TD 5-kb and 10-kb. (A) Schematic diagram showing the design of qPCR primers. The flanking fragment of the target site or the one containing tandem duplication obtained by PCR were ligated to the blunt vector to construct reference plasmids. qPCR primers were designed inside the amplified fragment. The primers used to construct the reference plasmids and qPCR primers are listed in Supplemental Table S4. (B) The standard curves for the reference plasmids were determined by CT values against log-transformed concentrations of serial tenfold dilutions ( $2 \times 10^2$ ,  $10^3$ ,  $10^4$ ,  $10^5$ ,  $10^6$ ,  $10^7$ ,  $10^8$  and  $10^9$  copies per  $1 \mu\text{l}$ ).

EMX1 TD 5-kb

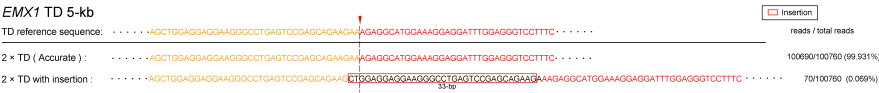

EMX1 TD 10-kb

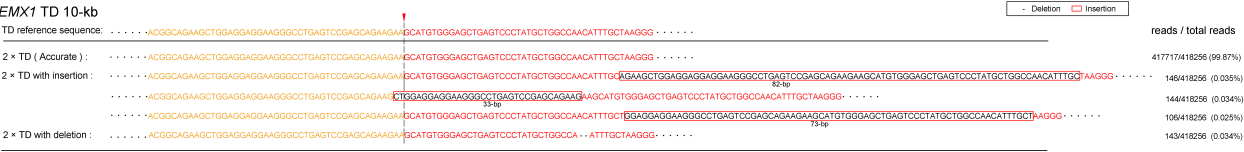

**Supplemental Fig. S25** Undesired edits of *EMXI* TD 5-kb/10-kb were determined by HTS.

Sequence corresponding to accurate TD allele was shown on top of the analysis. The sequences corresponding to each end of the TD were showed in red and yellow respectively. The red arrowhead pointed to the boundary of the duplication. Deletion and insertion were indicated by black dash and red box respectively. Note that most inserted sequences were the same as their 5' upstream sequences. The sequences with a ratio over 0.02% were shown.

**A**

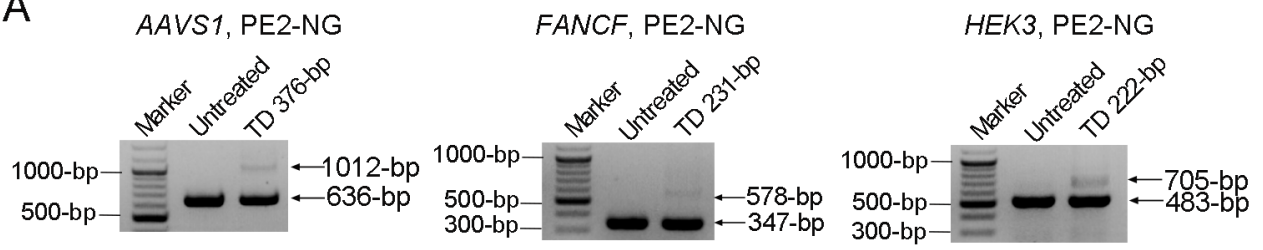

**B**

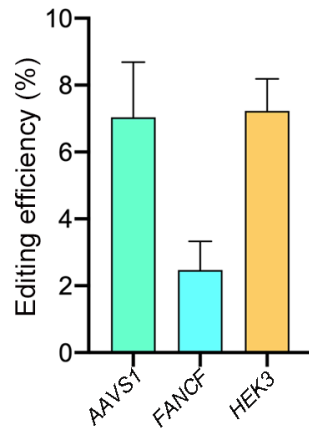



**Supplemental Fig. S26** Targeted TDs produced by PE2-NG. (A) Targeted TDs produced by PE2-NG. Agarose gel analysis of the presence of targeted tandem duplication at indicated loci. B, Quantification of the efficiency of targeted tandem duplication in (B) using Image J. Values and error bars reflect mean $\pm$  s.d. of n=3 independent biological replicates.

AAVS1 TD 376-bp L2R2

TD reference sequence: GTTTTCTGGACAACCCCAAAGTACCCCGTCTCCCTGGCT...AGTGGGGCCACTAGGGACAGGAAAAAGTACCCCGTCTCCCTGGCT...AGTGGGGCCACTAGGGACAGGATTGGTGACAGAAAAGCCC

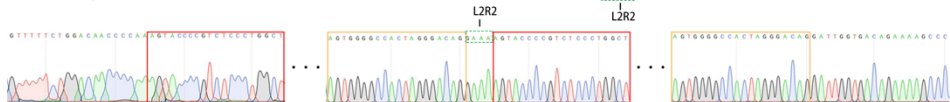

AAVS1 TD 376-bp L4R4

TD reference sequence: GTTTTCTGGACAACCCCAAAGTACCCCGTCTCCCTGGCT...AGTGGGGCCACTAGGGACAGGATTCCAAAGTACCCCGTCTCCCTGGCT...AGTGGGGCCACTAGGGACAGGATTGGTGACAGAAAAGCCC

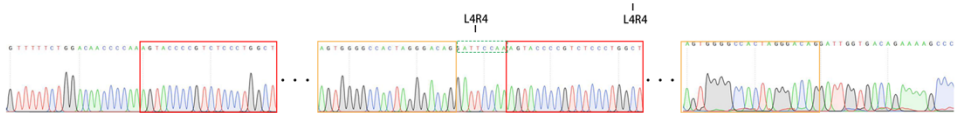

AAVS1 TD 376-bp L6R6

TD reference sequence: GTTTTCTGGACAACCCCAAAGTACCCCGTCTCCCTGGCT...AGTGGGGCCACTAGGGACAGGATTGGGCCCAAGTACCCCGTCTCCCTGGCT...AGTGGGGCCACTAGGGACAGGATTGGTGACAGAAAAGCCC

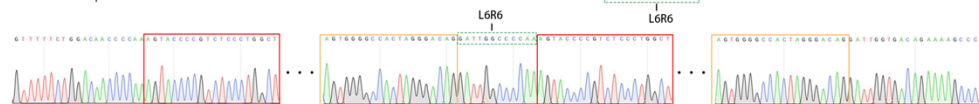

AAVS1 TD 376-bp L8R8

TD reference sequence: GTTTTCTGGACAACCCCAAAGTACCCCGTCTCCCTGGCT...AGTGGGGCCACTAGGGACAGGATTGGTGAACCCCAAAGTACCCCGTCTCCCTGGCT...AGTGGGGCCACTAGGGACAGGATTGGTGACAGAAAAGCCC

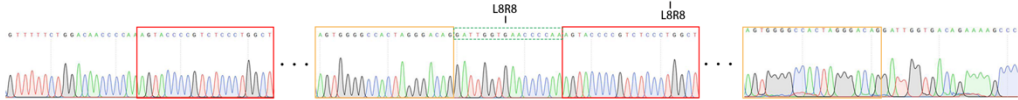

AAVS1 TD 376-bp L10R10

TD reference sequence: GTTTTCTGGACAACCCCAAAGTACCCCGTCTCCCTGGCT...AGTGGGGCCACTAGGGACAGGATTGGTGACACAACCCCAAAGTACCCCGTCTCCCTGGCT...AGTGGGGCCACTAGGGACAGGATTGGTGACAGAAAAGCCC

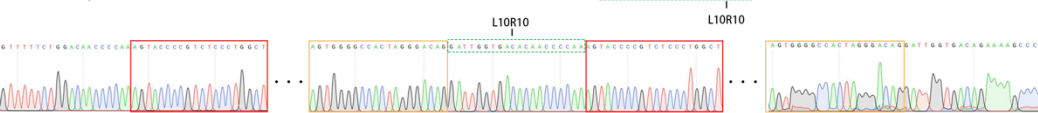

**Supplemental Fig.S27** Representative Sanger sequencing results of the additive fragment containing TDs at the *AAVSI* site (related to Fig. 4B). The PCR amplicons containing targeted TDs were gel-purified and subjected directly to Sanger sequencing. TD reference sequences were shown on top of each Sequencing chromatogram. The sequences corresponding to each end of the TDs were marked by yellow and red boxes respectively. Sequences in green dashed boxes represent additive fragments.

HEK3 TD 222-bp L2R2

TD reference sequence: AGGGCCTGGGATGTCCTGCA**GGGAGCTTGGCATGAGAAAC**...**TGGGGCCAGACTGAGCACCTGATGGCAGAGGAAAGGAAG**

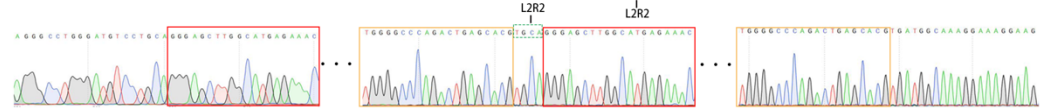

HEK3 TD 222-bp L4R4

TD reference sequence: AGGGCCTGGGATGTCCTGCA**GGGAGCTTGGCATGAGAAAC**...**TGGGGCCAGACTGAGCACCTGATGGCAGAGGAAAGGAAG**

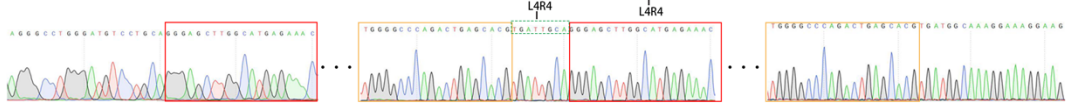

HEK3 TD 222-bp L6R6

TD reference sequence: AGGGCCTGGGATGTCCTGCA**GGGAGCTTGGCATGAGAAAC**...**TGGGGCCAGACTGAGCACCTGATGGCAGAGGAAAGGAAG**

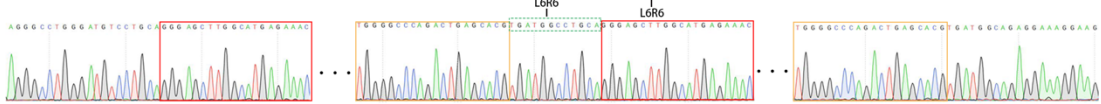

HEK3 TD 222-bp L8R8

TD reference sequence: AGGGCCTGGGATGTCCTGCA**GGGAGCTTGGCATGAGAAAC**...**TGGGGCCAGACTGAGCACCTGATGGCAGAGGAAAGGAAG**

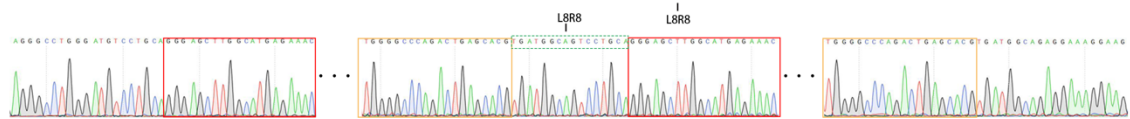

HEK3 TD 222-bp L10R10

TD reference sequence: AGGGCCTGGGATGTCCTGCA**GGGAGCTTGGCATGAGAAAC**...**TGGGGCCAGACTGAGCACCTGATGGCAGAGGAAAGGAAG**

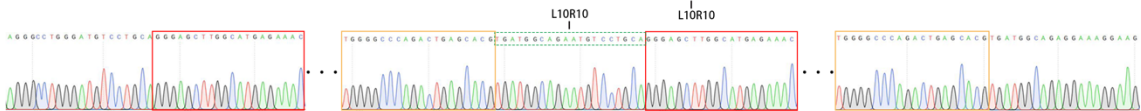

**Supplemental Fig.S28** Representative Sanger sequencing results of the additive fragment containing TDs at the *HEK3* site (related to Fig. 4B). The PCR amplicons containing targeted TDs were gel-purified and subjected directly to Sanger sequencing. TD reference sequences were shown on top of each Sequencing chromatogram. The sequences corresponding to each end of the TDs were marked by yellow and red boxes respectively. Sequences in green dashed boxes represent additive fragments.

RYR1 TD sequence

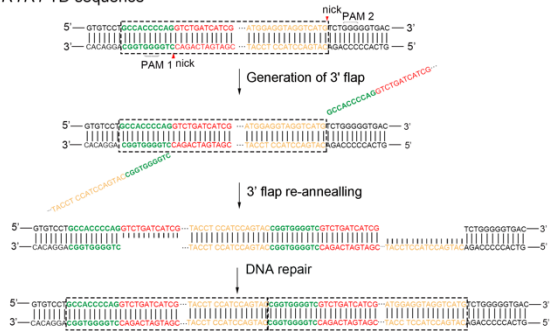

NCF2 TD sequence

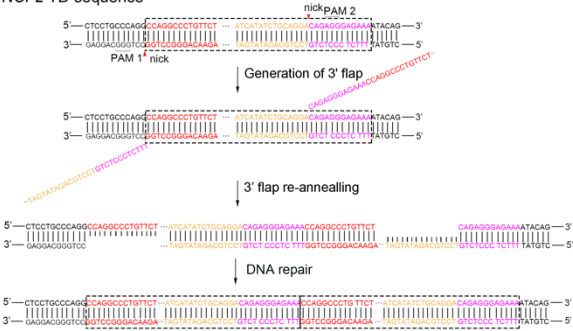

SATB2 TD sequence

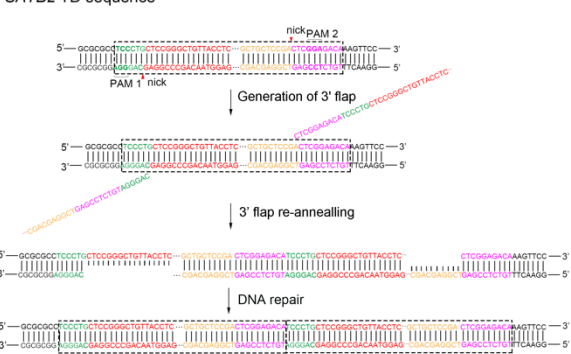

**Supplemental Fig.S29** PegRNAs design at three disease loci and the putative editing process of TD-PE strategy. PAM1 and PAM2 are the upstream and downstream PAMs respectively, and the red arrows indicate the positions of the nicks. Black dashed box indicates the sequences to be duplicated. Green and pink sequences denote the upstream and downstream additive fragments respectively.

*RYR1* TD 85-bp

TD reference sequence:CGGGCACTGACTTGTGTCCTGCCACCCCAAGGTCTGATCAT---GGATATGGAGGTAGGTCATGGCCACCCCAAGGTCTGATCAT---GGATATGGAGGTAGGTCATGCTGGGGGTGACCCAGAGGG

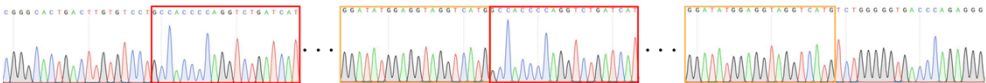

*NCF2* TD 149-bp

TD reference sequence:ATGATCCCTCCTGCCAGGCCAGGCCCTGTTCTCCTTAC---CTGCAGGACAGAGGGAGAAACAGGCCCTGTTCTCCTTAC---CTGCAGGACAGAGGGAGAAATACAGCAGTCTAGTGGATG

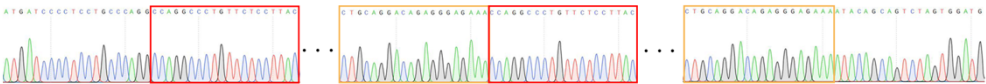

*ENG* TD 180-bp

TD reference sequence:CCCCACCGACCTGCCATGGGACACTCACCCTTGGGAAC---ACCTGTTGGAGAAACATCCGGACACTCACCCTTGGGAAC---ACCTGTTGGAGAAACATCCGGAAAGAGGCCAGGTGAGAAT

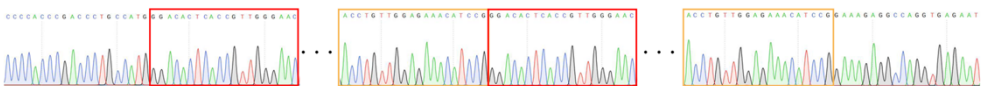

*SATB2* TD 209-bp

TD reference sequence:TGGGCCGCGGGCTGCGCGCCTCCCTGCTCCGGGCTGTAC---GCTGCTCCGACTCGGAGACATCCCTGCTCCGGGCTGTAC---GCTGCTCCGACTCGGAGACAAGTTCCACCGGCAGGTGCG

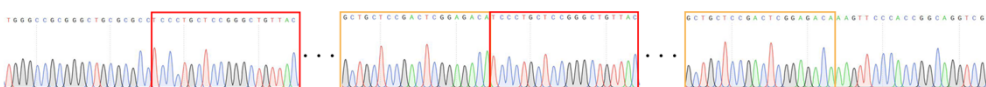



**Supplemental Fig.S30** Representative Sanger sequencing results of 4 disease-related TDs at indicated loci (related to Fig. 5B). The PCR amplicons containing targeted tandem duplication were gel-purified and subjected directly to Sanger sequencing. TD reference sequences were shown on top of each Sequencing result. The sequences corresponding to each end of the TDs were marked by red and yellow boxes respectively.

**Supplemental Table 1. List of the targets tested in this study.**

| sgRNA             | Target sequence                      | Oligo-F                       | Oligo-R                        | Reference                    |
|-------------------|--------------------------------------|-------------------------------|--------------------------------|------------------------------|
| <i>FANCF</i>      | GGAATCCCTTCTG<br>CAGCACC <b>TGG</b>  | CACCGGAATCCCTT<br>CTGCAGCACC  | AAACGGTGCTGCA<br>GAAGGGATTCC   | (Anzalone<br>et al.<br>2019) |
| <i>FANCF</i> -50  | GCCCTACTTCCGC<br>TTTCACCT <b>TGG</b> | CACCGCCCTACTTC<br>CGCTTTCACCT | AAACAGGTGAAAG<br>CGGAAGTAGGG   | (Anzalone<br>et al.<br>2019) |
| <i>EMXI</i>       | AGTCCGAGCAGA<br>AGAAGAA <b>GGG</b>   | CACCGAGTCCGAG<br>CAGAAGAAGAA  | AAACTTCTTCTTCT<br>GCTCGGACTC   | (Anzalone<br>et al.<br>2019) |
| <i>EMXI</i> -57   | CCGTTTGTACTTT<br>GTCCTC <b>CGG</b>   | CACCGCCGTTTGTA<br>CTTTGTCCTC  | AAACGAGGACAA<br>AGTACAAACGGC   | (Anzalone<br>et al.<br>2019) |
| <i>FANCF</i> +115 | GCAGAGAGTCGC<br>CGTCTCCA <b>AGG</b>  | CACCGCAGAGAGT<br>CGCCGTCTCCA  | AAACTGGAGACGG<br>CGACTCTCTGC   | This study                   |
| <i>FANCF</i> -115 | TATCCGTGTTCCCT<br>TGACTCT <b>GGG</b> | CACCGTATCCGTGT<br>TCCTTGACTCT | AAACAGAGTCAAG<br>GAACACGGATAC  | This study                   |
| <i>FANCF</i> -171 | TATCCGTGTTCCCT<br>TGACTCT <b>GGG</b> | CACCGTATCCGTGT<br>TCCTTGACTCT | AAACAGAGTCAAG<br>GAACACGGATAC  | This study                   |
| <i>FANCF</i> -231 | AAAGAGGTTCTT<br>CTTAGTGG <b>AGG</b>  | CACCGAAAGAGGT<br>TCTTCTTAGTGG | AAACCCACTAAGA<br>AGAACCTCTTTC  | This study                   |
| <i>EMXI</i> -116  | GGGGCACAGATG<br>AGAAACTC <b>AGG</b>  | CACCGGGGCACAG<br>ATGAGAAACTC  | AAACGAGTTTCTC<br>ATCTGTGCCCC   | (Anzalone<br>et al.<br>2019) |
| <i>EMXI</i> -201  | ACTGAGGCTACA<br>TAGGGTTA <b>GGG</b>  | CACCGACTGAGGCT<br>ACATAGGGTTA | AAACTAACCCTAT<br>GTAGCCTCAGTC  | This study                   |
| <i>EMXI</i> -307  | CAGTGGGCCAGA<br>GAGAAGGG <b>TGG</b>  | CACCGCAGTGGGC<br>CAGAGAGAAGGG | AAACCCCTTCTCT<br>CTGGCCCACTGC  | This study                   |
| <i>AAVSI</i>      | GGGGCCACTAGG<br>GACAGGAT <b>TGG</b>  | CACCGGGGCCACT<br>AGGGACAGGAT  | AAACATCCTGTCC<br>CTAGTGGCCCC   | This study                   |
| <i>AAVSI</i> -376 | CAGGGAGACGGG<br>GTACTTTG <b>GGG</b>  | CACCGCAGGGAGA<br>CGGGGTACTTTG | AAACCAAAGTACC<br>CCGTCTCCCTGC  | This study                   |
| <i>AAVSI</i> -532 | CAGCGAGTGAAG<br>ACGGCATG <b>GGG</b>  | CACCGCAGCGAGT<br>GAAGACGGCATG | AAACCATGCCGTC<br>TTCACCTCGCTGC | This study                   |
| <i>AAVSI</i> -846 | AAGGGGAAACAG<br>TGGGCCAG <b>AGG</b>  | CACCGAAGGGGAA<br>ACAGTGGGCCAG | AAACCTGGCCCAC<br>TGTTTCCCCTTC  | This study                   |
| <i>HEK3</i>       | GGCCCAGACTGA<br>GCACGTGA <b>TGG</b>  | CACCGGCCAGACT<br>GAGCACGTGA   | AAACTCACGTGCT<br>CAGTCTGGGCC   | (Anzalone<br>et al.<br>2019) |
| <i>HEK3</i> -136  | TCCCTGGGATCCC<br>TGTCTCC <b>AGG</b>  | CACCGTCCCTGGGA<br>TCCCTGTCTCC | AAACGGAGACAG<br>GGATCCCAGGGAC  | This study                   |
| <i>HEK3</i> -222  | TCTCATGCCAAGC<br>TCCCTGC <b>AGG</b>  | CACCGTCTCATGCC<br>AAGCTCCCTGC | AAACGCAGGGAGC<br>TTGGCATGAGAC  | This study                   |

|                   |                                     |                               |                                |            |
|-------------------|-------------------------------------|-------------------------------|--------------------------------|------------|
| <i>HEK3</i> +1    | TAAGACAATGGA<br>TACACTGG <b>AGG</b> | CACCGTAAGACAA<br>TGGATACACTGG | AAACCCAGTGTAT<br>CCATTGTCTTAC  | This study |
| <i>HEK3</i> -397  | TCTGTTGAGCTCG<br>ACCCTGA <b>AGG</b> | CACCGTCTGTTGAG<br>CTCGACCCTGA | AAACTCAGGGTCG<br>AGCTCAACAGAC  | This study |
| <i>HEK3</i> -499  | GTCAACCAGTAT<br>CCCGGTGC <b>AGG</b> | CACCGTCAACCAGT<br>ATCCCGGTGC  | AAACGCACCGGGA<br>TACTGGTTGAC   | This study |
| <i>ENG</i> +1     | GTTTCTGCAAGAC<br>CTGTTGG <b>AGA</b> | CACCGTTTCTGCAA<br>GACCTGTTGG  | AAACCCAACAGGT<br>CTTGCAGAAAC   | This study |
| <i>ENG</i> -180   | CTTCCTGGAGTTC<br>CCAACGG <b>TGA</b> | CACCGCTTCCTGGA<br>GTTCCCAACGG | AAACCCGTTGGGA<br>ACTCCAGGAAG C | This study |
| <i>SATB2</i> +1   | GCTCCATGCTGCT<br>CCGACTC <b>GGA</b> | CACCGCTCCATGCT<br>GCTCCGACTC  | AAACGAGTCGGAG<br>CAGCATGGAGC   | This study |
| <i>SATB2</i> -209 | GAGGTAACAGCC<br>CGGAGCAG <b>GGA</b> | CACCGAGGTAACA<br>GCCCCGAGCAG  | AAACCTGCTCCGG<br>GCTGTTACCTC   | This study |
| <i>NCF2</i> +1    | AAATCATATCTGC<br>AGGACAG <b>AGG</b> | CACCGAAATCATAT<br>CTGCAGGACAG | AAACCTGTCCTGC<br>AGATATGATTTC  | This study |
| <i>NCF2</i> -149  | AGGAGAACAGGG<br>CCTGGCCT <b>GGG</b> | CACCGAGGAGAAC<br>AGGGCCTGGCCT | AAACAGGCCAGGC<br>CCTGTTCTCCTC  | This study |
| <i>RYR1</i> +1    | TATGGAGGTAGG<br>TCATGTCT <b>GGG</b> | CACCGTATGGAGGT<br>AGGTCATGTCT | AAACAGACATGAC<br>CTACCTCCATAC  | This study |
| <i>RYR1</i> -85   | AGCGTCGATGAT<br>CAGACCTG <b>GGG</b> | CACCGAGCGTCGAT<br>GATCAGACCTG | AAACCAGGTCTGA<br>TCATCGACGCTC  | This study |

---

**Supplemental Table 2. Sequences of pegRNAs used in mammalian cell experiments.**

| pegRNA                        | spacer                   | 3' extension (5' to 3')                                   | PBS<br>length<br>(nt) | HA<br>length<br>(nt) |
|-------------------------------|--------------------------|-----------------------------------------------------------|-----------------------|----------------------|
| <i>FANCF</i> +TD50<br>pegRNA  | GGAATCCCTTCTGCAGCACC     | CGCGAAGGCCCTACTTCCGCTTTCAGCT<br>GCAGAAGGGA                | 13                    | 25                   |
| <i>FANCF</i> -TD50<br>pegRNA  | GCCCTACTTCCGCTTTCACCT    | CACCTCATGGAATCCCTTCTGCAGCTGA<br>AAGCGGAAGT                | 13                    | 25                   |
| <i>EMX1</i> +TD57<br>pegRNA   | GAGTCCGAGCAGAAGAAGA<br>A | CTCCAGCTTCTGCCGTTTGTACTTTGTCT<br>TCTTCTGCTCGG             | 13                    | 28                   |
| <i>EMX1</i> -TD57<br>pegRNA   | CCGTTTGTACTTTGTCCTC      | GAGGAAGGGCCTGAGTCCGAGCAGAAG<br>AAGACAAAGTACAAA            | 13                    | 29                   |
| <i>FANCF</i> +TD115<br>pegRNA | GCAGAGAGTCGCCGTCTCCA     | AGCGTCTTTATCCGTGTTCTTGACAGAC<br>GGCGACTC                  | 12                    | 25                   |
| <i>FANCF</i> -TD115<br>pegRNA | TATCCGTGTTTCCTTGACTCT    | ATCAGTACGCAGAGAGTCGCCGTCTGTC<br>AAGGAACAC                 | 12                    | 25                   |
| <i>FANCF</i> +TD171<br>pegRNA | GGAATCCCTTCTGCAGCACC     | AGCGTCTTTATCCGTGTTCTTGACGCTG<br>CAGAAGGGA                 | 13                    | 25                   |
| <i>FANCF</i> -TD171<br>pegRNA | TATCCGTGTTTCCTTGACTCT    | ACCTCATGGAATCCCTTCTGCAGCGTCA<br>AGGAACACG                 | 13                    | 24                   |
| <i>FANCF</i> +TD231<br>pegRNA | GGAATCCCTTCTGCAGCACC     | GCCACACAAAGAGGTTCTTCTTAGGCTG<br>CAGAAGGGA                 | 13                    | 24                   |
| <i>FANCF</i> -TD231<br>pegRNA | AAAGAGGTTCTTCTTAGTGG     | ACCTCATGGAATCCCTTCTGCAGC<br>CTAAGAAGAACCT                 | 13                    | 24                   |
| <i>EMX1</i> +TD116<br>pegRNA  | GAGTCCGAGCAGAAGAAGA<br>A | GGGAGGGAGGGGCACAGATGAGAAATT<br>CTTCTGCTCGG                | 13                    | 25                   |
| <i>EMX1</i> -TD116<br>pegRNA  | GGGGCACAGATGAGAAACTC     | AAGGGCCTGAGTCCGAGCAGAAGAATTT<br>CTCATCTGTG                | 13                    | 25                   |
| <i>EMX1</i> +TD201<br>pegRNA  | GAGTCCGAGCAGAAGAAGA<br>A | ATGGGAAGACTGAGGCTACATAGGGTTC<br>TTCTGCTCGG                | 13                    | 25                   |
| <i>EMX1</i> -TD201<br>pegRNA  | ACTGAGGCTACATAGGGTTA     | AAGGGCCTGAGTCCGAGCAGAAGAACC<br>CTATGTAGCCT                | 13                    | 25                   |
| <i>EMX1</i> +TD307<br>pegRNA  | GAGTCCGAGCAGAAGAAGA<br>A | GATGGCAGGGCAGGAAGAGGACACAGT<br>GGGCCAGAGAGAATTCTTCTGCTCGG | 13                    | 40                   |
| <i>EMX1</i> -TD307<br>pegRNA  | CAGTGGGCCAGAGAGAAGG<br>G | AGAAGCTGGAGGAGGAAGGGCCTGAGT<br>CCGAGCAGAAGAATTCTCTTGCCCC  | 13                    | 40                   |
| <i>AAVSI</i> +TD376<br>pegRNA | GGGGCCACTAGGGACAGGAT     | GAGGATGGAGAGGTGGCTAAAGCCAGG<br>GAGACGGGGTACTCTGTCCCTAGTGG | 13                    | 40                   |
| <i>AAVSI</i> -TD376<br>pegRNA | CAGGGAGACGGGGTACTTTG     | ATCTGTCCCCTCCACCCACAGTGGGGC<br>CACTAGGGACAGAGTACCCCGTCTC  | 13                    | 40                   |
| <i>AAVSI</i> +TD532<br>pegRNA | GGGGCCACTAGGGACAGGAT     | AGAAGGAGAAGGAAAAGGGAACCCAGC<br>GAGTGAAGACGGCCTGTCCCTAGTGG | 13                    | 40                   |
| <i>AAVSI</i> -TD532<br>pegRNA | CAGCGAGTGAAGACGGCATG     | ATCTGTCCCCTCCACCCACAGTGGGGC<br>CACTAGGGACAG GCCGTCTTCACTC | 13                    | 40                   |

|                                 |                           |                                                                           |    |    |
|---------------------------------|---------------------------|---------------------------------------------------------------------------|----|----|
| <i>AAVSI</i> +TD846<br>pegRNA   | GGGGCCACTAGGGACAGGAT      | AGAGAAAGCAGGACCTGCCTGGGAAGG<br>GGAAACAGTGGGCCTGTCCCTAGTGG                 | 13 | 40 |
| <i>AAVSI</i> -TD846<br>pegRNA   | AAGGGGAAACAGTGGGGCA<br>G  | ATCTGTCCCCTCCACCCCACAGTGGGGC<br>CACTAGGGACAGGGCCACTGTTTCC                 | 13 | 40 |
| <i>HEK3</i> +TD136<br>pegRNA    | GGCCCAGACTGAGCACGTGA      | TGGGCGTTTCCCTGGGATCCCTGTCCGTG<br>CTCAGTCTG                                | 13 | 25 |
| <i>HEK3</i> -TD136<br>pegRNA    | GTCCCTGGGATCCCTGTCTC<br>C | ATCCTTGGGGCCCAGACTGAGCACGGAC<br>AGGGATCCCA                                | 13 | 23 |
| <i>HEK3</i> +TD222<br>pegRNA    | GGCCCAGACTGAGCACGTGA      | AAGGTTTCTCATGCCAAGCTCCCCGTGC<br>TCAGTCTG                                  | 13 | 23 |
| <i>HEK3</i> -TD222<br>pegRNA    | GTCTCATGCCAAGCTCCCTG<br>C | ATCCTTGGGGCCCAGACTGAGCACGGGG<br>AGCTTGGCAT                                | 13 | 25 |
| <i>HEK3</i> +TD397<br>pegRNA    | TAAGACAATGGATACACTGG      | TGGGTGCCCTGAGATCTTTTCTCTGTGTG<br>AGCTCGACCCGTGTATCCATTGT                  | 13 | 39 |
| <i>HEK3</i> -TD397<br>pegRNA    | TCTGTTGAGCTCGACCCTGA      | TAATATCTCCCCATGTCCTACATAAGA<br>CAATGGATACACGGGTCGAGCTCAA                  | 13 | 40 |
| <i>HEK3</i> +TD499<br>pegRNA    | GTCAACCAGTATCCCGGTGC      | TAATATCTCCCCATGTCCTACATAAGA<br>CAATGGATACACCCGGGATACTGGT                  | 13 | 40 |
| <i>HEK3</i> -TD499<br>pegRNA    | TAAGACAATGGATACACTGG      | TGGCTTCCAGCCCAGCCAAACTTGTCAA<br>CCAGTATCCCGGGTGTATCCATTGT                 | 13 | 40 |
| <i>EMX1</i> +TD5K<br>pegRNA     | GAGTCCGAGCAGAAGAAGA<br>A  | AGCAGGAAAGGACCCTCCAAATCCTCCT<br>TTCCATGCCTCTTCTTCTGCTCGG                  | 13 | 40 |
| <i>EMX1</i> -TD5K<br>pegRNA     | CTCCTTTCCATGCCTCTGAG      | AGAAGCTGGAGGAGGAAGGGCCTGAGT<br>CCGAGCAGAAGAAAGAGGCATGGAAA                 | 13 | 40 |
| <i>EMX1</i> +TD10K<br>pegRNA    | GAGTCCGAGCAGAAGAAGA<br>A  | AGCAAATGTTGGCCAGCATAGGGACTCA<br>GCTCCCACATGCTTCTTCTGCTCGG                 | 13 | 40 |
| <i>EMX1</i> -TD10K<br>pegRNA    | ACTCAGCTCCCACATGCAGG      | AGAAGCTGGAGGAGGAAGGGCCTGAGT<br>CCGAGCAGAAGAAGCATGTGGGAGCT                 | 13 | 40 |
| <i>AAVSI</i> +TD L2R2<br>pegRNA | GGGGCCACTAGGGACAGGAT      | GAGGATGGAGAGGTGGCTAAAGCCAGG<br>GAGACGGGGTACTTTTCTGTCCCTAGT<br>GG          | 13 | 40 |
| <i>AAVSI</i> -TD L2R2<br>pegRNA | CAGGGAGACGGGGTACTTTG      | ATCTGTCCCCTCCACCCCACAGTGGGGC<br>CACTAGGGACAGGAAAAGTACCCCGTCT<br>C         | 13 | 40 |
| <i>AAVSI</i> +TD L4R4<br>pegRNA | GGGGCCACTAGGGACAGGAT      | GAGGATGGAGAGGTGGCTAAAGCCAGG<br>GAGACGGGGTACTTTGGAATCCTGTCCC<br>TAGTGG     | 13 | 40 |
| <i>AAVSI</i> -TD L4R4<br>pegRNA | CAGGGAGACGGGGTACTTTG      | ATCTGTCCCCTCCACCCCACAGTGGGGC<br>CACTAGGGACAGGATTCCAAAGTACCCC<br>GTCTC     | 13 | 40 |
| <i>AAVSI</i> +TD L6R6<br>pegRNA | GGGGCCACTAGGGACAGGAT      | GAGGATGGAGAGGTGGCTAAAGCCAGG<br>GAGACGGGGTACTTTGGGGCCAATCCTG<br>TCCCTAGTGG | 13 | 40 |

|                                      |                           |                                                                                   |    |    |
|--------------------------------------|---------------------------|-----------------------------------------------------------------------------------|----|----|
| <i>AAVSI</i> -TD L6R6<br>pegRNA      | CAGGGAGACGGGGTACTTTG      | ATCTGTCCCCTCCACCCCACAGTGGGGC<br>CACTAGGGACAGGATTGGCCCCAAAGTA<br>CCCCGTCTC         | 13 | 40 |
| <i>AAVSI</i> +TD L8R8<br>pegRNA      | GGGGCCACTAGGGACAGGAT      | GAGGATGGAGAGGTGGCTAAAGCCAGG<br>GAGACGGGGTACTTTGGGGTTACCAAT<br>CCTGTCCCTAGTGG      | 13 | 40 |
| <i>AAVSI</i> -TD L8R8<br>pegRNA      | CAGGGAGACGGGGTACTTTG      | ATCTGTCCCCTCCACCCCACAGTGGGGC<br>CACTAGGGACAGGATTGGTGAACCCCAA<br>AGTACCCCGTCTC     | 13 | 40 |
| <i>AAVSI</i> +TD<br>L10R10<br>pegRNA | GGGGCCACTAGGGACAGGAT      | GAGGATGGAGAGGTGGCTAAAGCCAGG<br>GAGACGGGGTACTTTGGGGTTGTGTCAC<br>CAATCCTGTCCCTAGTGG | 13 | 40 |
| <i>AAVSI</i> -TD<br>L10R10<br>pegRNA | CAGGGAGACGGGGTACTTTG      | ATCTGTCCCCTCCACCCCACAGTGGGGC<br>CACTAGGGACAGGATTGGTGACACAACC<br>CCAAAGTACCCCGTCTC | 13 | 40 |
| <i>HEK3</i> +TD L2R2<br>pegRNA       | GGCCCAGACTGAGCACGTGA      | AAGGTTTCTCATGCCAAGCTCCCTGCAC<br>GTGCTCAGTCTG                                      | 13 | 23 |
| <i>HEK3</i> -TD L2R2<br>pegRNA       | GTCTCATGCCAAGCTCCCTG<br>C | ATCCTTGGGGCCCAGACTGAGCACGTGC<br>AGGGAGCTTGGCAT                                    | 13 | 25 |
| <i>HEK3</i> +TD L4R4<br>pegRNA       | GGCCCAGACTGAGCACGTGA      | AAGGTTTCTCATGCCAAGCTCCCTGCAA<br>TCACGTGCTCAGTCTG                                  | 13 | 23 |
| <i>HEK3</i> -TD L4R4<br>pegRNA       | GTCTCATGCCAAGCTCCCTG<br>C | ATCCTTGGGGCCCAGACTGAGCACGTGA<br>TTGCAGGGAGCTTGGCAT                                | 13 | 25 |
| <i>HEK3</i> +TD L6R6<br>pegRNA       | GGCCCAGACTGAGCACGTGA      | AAGGTTTCTCATGCCAAGCTCCCTGCAG<br>GCCATCACGTGCTCAGTCTG                              | 13 | 23 |
| <i>HEK3</i> -TD L6R6<br>pegRNA       | GTCTCATGCCAAGCTCCCTG<br>C | ATCCTTGGGGCCCAGACTGAGCACGTGA<br>TGGCCTGCAGGGAGCTTGGCAT                            | 13 | 25 |
| <i>HEK3</i> +TD L8R8<br>pegRNA       | GGCCCAGACTGAGCACGTGA      | AAGGTTTCTCATGCCAAGCTCCCTGCAG<br>GAGCCATCACGTGCTCAGTCTG                            | 13 | 23 |
| <i>HEK3</i> -TD L8R8<br>pegRNA       | GTCTCATGCCAAGCTCCCTG<br>C | ATCCTTGGGGCCCAGACTGAGCACGTGA<br>TGGCAGTCCTGCAGGGAGCTTGGCAT                        | 13 | 25 |
| <i>HEK3</i> +TD<br>L10R10<br>pegRNA  | GGCCCAGACTGAGCACGTGA      | AAGGTTTCTCATGCCAAGCTCCCTGCAG<br>GACATTCTGCCATCACGTGCTCAGTCTG                      | 13 | 23 |
| <i>HEK3</i> -TD<br>L10R10<br>pegRNA  | GTCTCATGCCAAGCTCCCTG<br>C | ATCCTTGGGGCCCAGACTGAGCACGTGA<br>TGGCAGAATGTCCTGCAGGGAGCTTGGC<br>AT                | 13 | 25 |
| <i>ENG</i> +180<br>pegRNA            | GTTTCTGCAAGACCTGTTGG      | CATGTCCTCTTCCTGGAGTTCCCAACGGT<br>GAGTGTCCCGGATGTTTCTCCAACAGGT<br>CTTGCA           | 13 | 25 |
| <i>ENG</i> -180<br>pegRNA            | CTTCCTGGAGTTCCCAACGG      | AATGGACTGTTTCTGCAAGACCTGTTGG<br>AGAAACATCCGGGACACTACCGTTGGG<br>AACTCCAG           | 13 | 25 |
| <i>SATB2</i> +209<br>pegRNA          | GCTCCATGCTGCTCCGACTC      | GGCCGTGGGAGGTAACAGCCCGGAGCA<br>GGGATGTCTCCGAGTCGGAGCAGCATG                        | 13 | 25 |

|                   |                      |                              |    |    |
|-------------------|----------------------|------------------------------|----|----|
| <i>SATB2</i> -209 | GAGGTAACAGCCCGGAGCA  | GCTCCGCCGCTCCATGCTGCTCCGACTC | 13 | 25 |
| pegRNA            | G                    | GGAGACATCCCTGCTCCGGGCTGTTA   |    |    |
| <i>NCF2</i> +149  | AGGAGAACAGGGCCTGGCCT | GTGAGGTAAGGAGAACAGGGCCTGGTTT | 13 | 25 |
| pegRNA            |                      | CTCCCTCTGTCCTGCAGATATG       |    |    |
| <i>NCF2</i> -149  | AAATCATATCTGCAGGACAG | TGATAGCCAAATCATATCTGCAGGACAG | 13 | 25 |
| pegRNA            |                      | AGGGAGAAACCAGGCCCTGTTC       |    |    |
| <i>RYR1</i> +85   | TATGGAGGTAGGTCATGTCT | TCACCAAAGCGTCGATGATCAGACCTG  | 13 | 25 |
| pegRNA            |                      | GGGTGGCCATGACCTACCTC         |    |    |
| <i>RYR1</i> -85   | AGCGTCGATGATCAGACCTG | AAGGAGGATATGGAGGTAGGTCATGGC  | 13 | 25 |
| pegRNA            |                      | CACCCCAGGTCTGATCATCGA        |    |    |

---

**Supplemental Table 3. Summary of primers for amplification of each target sites.**

| Target site              | Forward primer        | Reverse primer        | Figures      |
|--------------------------|-----------------------|-----------------------|--------------|
| <i>FANCF</i>             | AAGACGCTGGGAGATTGACA  | CAAAGCGCCGATGGATGTG   | Fig. 1B      |
| <i>EMX1</i>              | TGGGGGCCTCCTGAGTTT    | CTCTGCCCTCGTGGGTTTGT  | Fig. 1B      |
| <i>FANCF</i>             | CATCATCTCGCACGTGGTTC  | TGCTGACGTAGGTAGTGCTT  | Fig. 2B      |
| <i>EMX1</i>              | GCTTCCAGAGCCTGCACTCC  | TCGATGTCCTCCCCATTGGC  | Fig. 2B      |
| <i>AAVS1</i>             | GAACTCTGCCCTCTAACGCT  | AGAGGTTCTGGCAAGGAGAG  | Fig. 2B      |
| <i>HEK3</i>              | GTGAGCTGCTGTCCCAGAGG  | ATGCAGGTGCTGAAAGCCAC  | Fig. 2B      |
| <i>HEK3</i>              | CACGTGATGGCAGAGGAAAG  | GGCATTGTTATTTCCCTCCCA | Fig. 2B      |
| <i>HEK3</i>              | TTGATGAATCAGTGCTGGAG  | GAGCTGCACATACTAGCC    | Supplemental |
| TD136-bp                 |                       |                       | Fig. S22B    |
| <i>EMX1</i> TD 5-<br>kb  | TGGGGGCCTCCTGAGTTT    | AGCTCCTCACAGAACCACTC  | Fig. 2D      |
| <i>EMX1</i> TD 10-<br>kb | TGGGGGCCTCCTGAGTTT    | CAACACACACACTGGAGACT  | Fig. 2D      |
| <i>AAVS1</i>             | CCTGTGCCATCTCTCGTTTC  | AGAGGTTCTGGCAAGGAGAG  | Fig. 3B      |
| <i>ENG</i>               | CTAACGAGGACTCAGCCACTG | AGTCCCTAGGAGACGTTTGGA | Fig. 3C      |
| <i>SATB2</i>             | TAATCCTACACCGCGACAGC  | TGGCCTGAACGTCTATCACG  | Fig. 3C      |
| <i>NCF2</i>              | CATGGTCCTTTGCGCTTCAC  | GGAAGGGAGAAGCAGACTC   | Fig. 3C      |
| <i>RYR1</i>              | GCAAGCCCTGGAGGTAGGTA  | CACCCCCTTTCCTAACTGGC  | Fig. 3C      |



**Supplemental Table S4. Primers used for qPCR to detect the copy number of target DNA fragments.**

| Target site                                  | Forward primer        | Reverse primer        |
|----------------------------------------------|-----------------------|-----------------------|
| <i>EMXI</i> TD 5-kb/10-kb flanking (plasmid) | AGGGCTCCCATCACATCAA   | ACGCGTTTGCTCTACCAGCC  |
| <i>EMXI</i> TD 5-kb (plasmid)                | CTGTGACCCTTTGTTTGAGA  | CACCGTGAGCTAGGAACAAA  |
| <i>EMXI</i> TD 10-kb (plasmid)               | CTGCCATCCCCTTCTGTGAA  | CTTCCCCTTTCTCCACCTCT  |
| <i>EMXI</i> TD 5-kb/10-kb flanking           | GGCCAATGGGGAGGACATC   | TTGTCCCTCTGTCAATGGCG  |
| <i>EMXI</i> TD 5-kb                          | GGCCTGAGTCCGAGCAGAA   | TCCCCCTCTTATCCATCCCTC |
| <i>EMXI</i> TD 10-kb                         | CGAGCAGAAGAAGCATGTGGG | GTTTCTGCATGGGCGTGTG   |

**Supplemental Table S5. Sequences of primers used for HTS.**

| sample name            | Primer Name                         | Sequence                    |
|------------------------|-------------------------------------|-----------------------------|
| <i>FANCF</i> TD 50-bp  | <i>FANCF</i> -HTS-1-forward         | acacagtAGGCGTATCATTTGCGGGAT |
|                        | <i>FANCF</i> -HTS-reverse           | AAAAGCGATCCAGGTGCTGC        |
| <i>FANCF</i> TD 50-bp  | <i>FANCF</i> -HTS-2-forward         | acagtcaAGGCGTATCATTTGCGGGAT |
|                        | <i>FANCF</i> -HTS-reverse           | AAAAGCGATCCAGGTGCTGC        |
| <i>FANCF</i> TD 50-bp  | <i>FANCF</i> -HTS-3-forward         | actctgaAGGCGTATCATTTGCGGGAT |
|                        | <i>FANCF</i> -HTS-reverse           | AAAAGCGATCCAGGTGCTGC        |
| <i>FANCF</i> -CTR      | <i>FANCF</i> -HTS-4-forward         | gtagtctAGGCGTATCATTTGCGGGAT |
|                        | <i>FANCF</i> -HTS-reverse           | AGGTAGCGCGCCCACTGCAA        |
| <i>FANCF</i> -CTR      | <i>FANCF</i> -HTS-5-forward         | gtcacatAGGCGTATCATTTGCGGGAT |
|                        | <i>FANCF</i> -HTS-reverse           | AGGTAGCGCGCCCACTGCAA        |
| <i>FANCF</i> -CTR      | <i>FANCF</i> -HTS-6-forward         | gtctagtAGGCGTATCATTTGCGGGAT |
|                        | <i>FANCF</i> -HTS-reverse           | AGGTAGCGCGCCCACTGCAA        |
| <i>EMX1</i> TD 57-bp   | <i>EMX1</i> -HTS-1-forward          | catcagaTGGGGGCCTCCTGAGTTT   |
|                        | <i>EMX1</i> -HTS-reverse            | TGATGTGATGGGAGCCCTTC        |
| <i>EMX1</i> TD 57-bp   | <i>EMX1</i> -HTS-2-forward          | catgtctTGGGGGCCTCCTGAGTTT   |
|                        | <i>EMX1</i> -HTS-reverse            | TGATGTGATGGGAGCCCTTC        |
| <i>EMX1</i> TD 57-bp   | <i>EMX1</i> -HTS-3-forward          | cacaagtTGGGGGCCTCCTGAGTTT   |
|                        | <i>EMX1</i> -HTS-reverse            | TGATGTGATGGGAGCCCTTC        |
| <i>EMX1</i> -CTR       | <i>EMX1</i> -HTS-4-forward          | acacgtaTGGGGGCCTCCTGAGTTT   |
|                        | <i>EMX1</i> -HTS-reverse            | TGATGTGATGGGAGCCCTTC        |
| <i>EMX1</i> -CTR       | <i>EMX1</i> -HTS-5-forward          | acagatcTGGGGGCCTCCTGAGTTT   |
|                        | <i>EMX1</i> -HTS-reverse            | TGATGTGATGGGAGCCCTTC        |
| <i>EMX1</i> -CTR       | <i>EMX1</i> -HTS-6-forward          | acagcatTGGGGGCCTCCTGAGTTT   |
|                        | <i>EMX1</i> -HTS-reverse            | TGATGTGATGGGAGCCCTTC        |
| <i>AAVSI</i> TD 376-bp | <i>AAVSI</i> TD-376 -HTS -1-forward | cttgagtATTCCCAGGGCCGGTTAATG |
|                        | <i>AAVSI</i> TD-376 -reverse        | GTGACCCGAATCCACAGGAG        |
| <i>AAVSI</i> TD 376-bp | <i>AAVSI</i> TD-376 -HTS -2-forward | ctcacgaATTCCCAGGGCCGGTTAATG |
|                        | <i>AAVSI</i> TD-376 -reverse        | GTGACCCGAATCCACAGGAG        |
| <i>AAVSI</i> TD 376-bp | <i>AAVSI</i> TD-376 -HTS -3-forward | ctcagacATTCCCAGGGCCGGTTAATG |
|                        | <i>AAVSI</i> TD-376 -reverse        | GTGACCCGAATCCACAGGAG        |
| <i>AAVSI</i> TD 532-bp | <i>AAVSI</i> TD-532 -HTS -1-forward | ctctcagATTCCCAGGGCCGGTTAATG |
|                        | <i>AAVSI</i> TD-532 -reverse        | GAGACATCCGTCGGAGAAGG        |
| <i>AAVSI</i> TD 532-bp | <i>AAVSI</i> TD-532 -HTS -2-forward | ctctgtaATTCCCAGGGCCGGTTAATG |
|                        | <i>AAVSI</i> TD-532 -reverse        | GAGACATCCGTCGGAGAAGG        |
| <i>AAVSI</i> TD 532-bp | <i>AAVSI</i> TD-532 -HTS -3-forward | ctgatgtATTCCCAGGGCCGGTTAATG |
|                        | <i>AAVSI</i> TD-532 -reverse        | GAGACATCCGTCGGAGAAGG        |
| <i>AAVSI</i> TD 846-bp | <i>AAVSI</i> TD-846-HTS -1-forward  | ctgtagaATTCCCAGGGCCGGTTAATG |
|                        | <i>AAVSI</i> TD-846 -reverse        | CAAGCTGCAGACAGAAAGCG        |
| <i>AAVSI</i> TD 846-bp | <i>AAVSI</i> TD-846 -HTS -2-forward | gaacactATTCCCAGGGCCGGTTAATG |
|                        | <i>AAVSI</i> TD-846 -reverse        | CAAGCTGCAGACAGAAAGCG        |
| <i>AAVSI</i> TD 846-bp | <i>AAVSI</i> TD-846 -HTS -3-forward | gatctcaATTCCCAGGGCCGGTTAATG |
|                        | <i>AAVSI</i> TD-846-reverse         | CAAGCTGCAGACAGAAAGCG        |

|                        |                                    |                             |
|------------------------|------------------------------------|-----------------------------|
| <i>EMXI</i> TD 116-bp  | <i>EMXI</i> TD-116-HTS -1-forward  | cacactgTCCAGAACCGGAGGACAAAG |
|                        | <i>EMXI</i> TD-116-reverse         | ACCACACCTTCACCTGGG          |
| <i>EMXI</i> TD 116-bp  | <i>EMXI</i> TD-116-HTS -2-forward  | cacttgaTCCAGAACCGGAGGACAAAG |
|                        | <i>EMXI</i> TD-116-reverse         | ACCACACCTTCACCTGGG          |
| <i>EMXI</i> TD 116-bp  | <i>EMXI</i> TD-116-HTS -3-forward  | cactgatTCCAGAACCGGAGGACAAAG |
|                        | <i>EMXI</i> TD-116-reverse         | ACCACACCTTCACCTGGG          |
| <i>EMXI</i> TD 201-bp  | <i>EMXI</i> TD-201-HTS -1-forward  | cagatcaTGGGGGCCTCCTGAGTTT   |
|                        | <i>EMXI</i> TD-201-reverse         | CCTCAACACTCAGGCTGAGC        |
| <i>EMXI</i> TD 201-bp  | <i>EMXI</i> TD-201-HTS -2-forward  | cagacatTGGGGGCCTCCTGAGTTT   |
|                        | <i>EMXI</i> TD-201-reverse         | CCTCAACACTCAGGCTGAGC        |
| <i>EMXI</i> TD 201-bp  | <i>EMXI</i> TD-201-HTS -3-forward  | cagagtcTGGGGGCCTCCTGAGTTT   |
|                        | <i>EMXI</i> TD-201-reverse         | CCTCAACACTCAGGCTGAGC        |
| <i>EMXI</i> TD 307-bp  | <i>EMXI</i> TD-307-HTS -1-forward  | cagtactGTTTCTCATCTGTGCCCTCC |
|                        | <i>EMXI</i> TD-307-reverse         | GCTCCCATGGGTCTAACATTC       |
| <i>EMXI</i> TD 307-bp  | <i>EMXI</i> TD-307-HTS -2-forward  | cagtctaGTTTCTCATCTGTGCCCTCC |
|                        | <i>EMXI</i> TD-307-reverse         | GCTCCCATGGGTCTAACATTC       |
| <i>EMXI</i> TD 307-bp  | <i>EMXI</i> TD-307-HTS -3-forward  | ctagacaGTTTCTCATCTGTGCCCTCC |
|                        | <i>EMXI</i> TD-307-reverse         | GCTCCCATGGGTCTAACATTC       |
| <i>FANCF</i> TD 115-bp | <i>FANCF</i> TD-115-HTS -1-forward | cagtactATAGCATTGCAGAGAGGCGT |
|                        | <i>FANCF</i> TD-115-reverse        | GGTCGAAATGCATGTCAATC        |
| <i>FANCF</i> TD 115-bp | <i>FANCF</i> TD-115-HTS -1-forward | cagtactATAGCATTGCAGAGAGGCGT |
|                        | <i>FANCF</i> TD-115-reverse        | GGTCGAAATGCATGTCAATC        |
| <i>FANCF</i> TD 115-bp | <i>FANCF</i> TD-115-HTS -1-forward | cagtactATAGCATTGCAGAGAGGCGT |
|                        | <i>FANCF</i> TD-115-reverse        | GGTCGAAATGCATGTCAATC        |
| <i>FANCF</i> TD 171-bp | <i>FANCF</i> TD-171-HTS -1-forward | tgtcagtATAGCATTGCAGAGAGGCGT |
|                        | <i>FANCF</i> TD-171-reverse        | GGTCGAAATGCATGTCAATC        |
| <i>FANCF</i> TD 171-bp | <i>FANCF</i> TD-171-HTS -1-forward | tggtgcaATAGCATTGCAGAGAGGCGT |
|                        | <i>FANCF</i> TD-171-reverse        | GGTCGAAATGCATGTCAATC        |
| <i>FANCF</i> TD 171-bp | <i>FANCF</i> TD-171-HTS -1-forward | caactgtATAGCATTGCAGAGAGGCGT |
|                        | <i>FANCF</i> TD-171-reverse        | GGTCGAAATGCATGTCAATC        |
| <i>FANCF</i> TD 231-bp | <i>FANCF</i> TD-231-HTS -1-forward | catcagaCGCTGGGAGATTGACATGCA |
|                        | <i>FANCF</i> TD-231-reverse        | CCGTGTTTCCTTGACTCTGGG       |
| <i>FANCF</i> TD 231-bp | <i>FANCF</i> TD-231-HTS -1-forward | catgtctCGCTGGGAGATTGACATGCA |
|                        | <i>FANCF</i> TD-231-reverse        | CCGTGTTTCCTTGACTCTGGG       |
| <i>FANCF</i> TD 231-bp | <i>FANCF</i> TD-231-HTS -1-forward | cacaagtCGCTGGGAGATTGACATGCA |
|                        | <i>FANCF</i> TD-231-reverse        | CCGTGTTTCCTTGACTCTGGG       |
| <i>HEK3</i> TD 136-bp  | <i>HEK3</i> TD-136-HTS -1-forward  | gacatctGCATTTGTAGGCTTGATGCT |
|                        | <i>HEK3</i> TD-136-reverse         | ATGCTTACTTGCAGCAGAAA        |
| <i>HEK3</i> TD 136-bp  | <i>HEK3</i> TD-136-HTS -2-forward  | gacagtaGCATTTGTAGGCTTGATGCT |
|                        | <i>HEK3</i> TD-136-reverse         | ATGCTTACTTGCAGCAGAAA        |
| <i>HEK3</i> TD 136-bp  | <i>HEK3</i> TD-136-HTS -3-forward  | gactacaGCATTTGTAGGCTTGATGCT |
|                        | <i>HEK3</i> TD-136-reverse         | ATGCTTACTTGCAGCAGAAA        |
| <i>HEK3</i> TD 222-bp  | <i>HEK3</i> TD-222-HTS -1-forward  | gactcacGCATTTGTAGGCTTGATGCT |
|                        | <i>HEK3</i> TD-222-reverse         | ATGCTTACTTGCAGCAGAAA        |
| <i>HEK3</i> TD 222-bp  | <i>HEK3</i> TD-222-HTS -2-forward  | gagtcgtGCATTTGTAGGCTTGATGCT |

|                       |                                   |                              |
|-----------------------|-----------------------------------|------------------------------|
|                       | <i>HEK3</i> TD-222-reverse        | ATGCTTACTTGCAGCAGAAA         |
| <i>HEK3</i> TD 222-bp | <i>HEK3</i> TD-222-HTS -3-forward | gtacagaGCATTGTAGGCTTGATGCT   |
|                       | <i>HEK3</i> TD-222-reverse        | ATGCTTACTTGCAGCAGAAA         |
| <i>HEK3</i> TD 397-bp | <i>HEK3</i> TD-397-HTS -1-forward | gtagtctTGAGCACTTGTTACACGCAG  |
|                       | <i>HEK3</i> TD-397-reverse        | CTGATTTTCATGCAGGTGCT         |
| <i>HEK3</i> TD 397-bp | <i>HEK3</i> TD-397-HTS -2-forward | gtcacatTGAGCACTTGTTACACGCAG  |
|                       | <i>HEK3</i> TD-397-reverse        | CTGATTTTCATGCAGGTGCT         |
| <i>HEK3</i> TD 397-bp | <i>HEK3</i> TD-397-HTS -3-forward | gtctagtTGAGCACTTGTTACACGCAG  |
|                       | <i>HEK3</i> TD-397-reverse        | CTGATTTTCATGCAGGTGCT         |
| <i>HEK3</i> TD 499-bp | <i>HEK3</i> TD-499-HTS -1-forward | gtcgtgaGTTACACGCAGGGCACTATG  |
|                       | <i>HEK3</i> TD-499-reverse        | TGTTGAGCTCGACCCTGAAG         |
| <i>HEK3</i> TD 499-bp | <i>HEK3</i> TD-499-HTS -2-forward | gtgaacaGTTACACGCAGGGCACTATG  |
|                       | <i>HEK3</i> TD-499-reverse        | TGTTGAGCTCGACCCTGAAG         |
| <i>HEK3</i> TD 499-bp | <i>HEK3</i> TD-499-HTS -3-forward | gtgactcGTTACACGCAGGGCACTATG  |
|                       | <i>HEK3</i> TD-499-reverse        | TGTTGAGCTCGACCCTGAAG         |
| <i>EMX1</i> TD 5-kb   | <i>EMX1</i> TD 5kb-HTS-1-forward  | atctgctTCCAGAACCGGAGGACAAAG  |
|                       | <i>EMX1</i> TD 5kb-reverse        | TCCCCCTCTTATCCATCCCTC        |
| <i>EMX1</i> TD 5-kb   | <i>EMX1</i> TD 5kb-HTS-2-forward  | atgtgacTCCAGAACCGGAGGACAAAG  |
|                       | <i>EMX1</i> TD 5kb-reverse        | TCCCCCTCTTATCCATCCCTC        |
| <i>EMX1</i> TD 5-kb   | <i>EMX1</i> TD 5kb-HTS-3-forward  | atgcactTCCAGAACCGGAGGACAAAG  |
|                       | <i>EMX1</i> TD 5kb-reverse        | TCCCCCTCTTATCCATCCCTC        |
| <i>EMX1</i> TD 10-kb  | <i>EMX1</i> TD 10kb-HTS-1-forward | acaactgGTTCCAGAACCGGAGGACAAA |
|                       | <i>EMX1</i> TD 10kb-reverse       | CCAGCCTCCCTACTGTCTTTTT       |
| <i>EMX1</i> TD 10-kb  | <i>EMX1</i> TD 10kb-HTS-2-forward | acatcgaGTTCCAGAACCGGAGGACAAA |
|                       | <i>EMX1</i> TD 10kb-reverse       | CCAGCCTCCCTACTGTCTTTTT       |
| <i>EMX1</i> TD 10-kb  | <i>EMX1</i> TD 10kb-HTS-3-forward | acatgagGTTCCAGAACCGGAGGACAAA |
|                       | <i>EMX1</i> TD 10kb-reverse       | CCAGCCTCCCTACTGTCTTTTT       |

---

## Supplemental Reference

Anzalone AV, Randolph PB, Davis JR, Sousa AA, Koblan LW, Levy JM, Chen PJ, Wilson C, Newby GA, Raguram A et al. 2019. Search-and-replace genome editing without double-strand breaks or donor DNA. *Nature* **576**: 149-157.
